# Supplementary material for: In crystallo homolytic cleavage of a terminal lanthanum( iii )–methyl bond by Cu Kα X-radiation forms a La( ii ) complex
Source: Royal Society of Chemistry journal article supplement (doi:10.1039/d5cc04945h), 2025-12-05
Supplement: d5cc04945h1.pdf [file d5cc04945h1.pdf]

***In Crystallo Homolytic Cleavage of a Terminal Lanthanum(III)- Methyl Bond by Cu K $\alpha$  X-  
Radiation Forms a La(II) Complex***

Cary R. Stennett,<sup>a</sup> Makayla R. Luevano,<sup>a</sup> Joseph W. Ziller,<sup>a</sup> and William J. Evans<sup>\*a</sup>

<sup>a</sup> Department of Chemistry, University of California, Irvine, California, 92697-2025

**Supporting Information**

The Supporting Information contains:

|                                          |               |
|------------------------------------------|---------------|
| <b>1. Experimental .....</b>             | <b>S1</b>     |
| <b>General Considerations.....</b>       | <b>S1</b>     |
| <b>2. Crystallographic Details .....</b> | <b>S2-S40</b> |
| <b>3. References .....</b>               | <b>S41</b>    |

## 1. Experimental.

**General Considerations.** All manipulations were performed by using modified Schlenk techniques or in a Vacuum/Atmospheres glovebox under argon. Solvents were degassed by sparging with dry argon before drying and collection using a Grubbs-type<sup>1</sup> solvent purification system (JC Meyer). The methyl complex  $\text{Ln}(\text{SAr}^{i\text{Pr6}})_2\text{CH}_3$ , **1**, was prepared by treatment of  $\text{Ln}(\text{SAr}^{i\text{Pr6}})_2\text{I}^2$  with methyllithium in diethyl ether as previously described.<sup>3</sup> Crystals of **1** were covered in Paratone oil in an argon-filled glovebox. A suitable crystal was then selected and mounted in a nylon cryoloop and immediately transferred to the nitrogen cold stream of the diffractometer. Data were collected on samples cooled to 100 K using a dual source Bruker D8 Venture diffractometer equipped with a Bruker PHOTON III CMOS detector. For this study, Cu K $\alpha$  radiation (Bruker I $\mu$ S DIAMOND-II, 50 W,  $\lambda = 1.54 \text{ \AA}$ ) was used to study the transformation of  $\text{Ln}(\text{SAr}^{i\text{Pr6}})_2\text{CH}_3$ , **1**, to  $\text{La}(\text{SAr}^{i\text{Pr6}})_2$ ,<sup>2, 4</sup> **2**, by radiolysis.

## 2. Crystallographic Details

**Table S1.** X-ray data collection parameters and crystallographic details for  $\text{La}(\text{SAr}^{i\text{Pr6}})_2\text{CH}_3 \cdot 0.5(\text{C}_6\text{H}_{14})$ , **1**  $\cdot$  **0.5(C<sub>6</sub>H<sub>14</sub>)**, after experiment 1 (5 Hours of X-ray Irradiation).

Note: Fractional values for C and H are given in the following formula due to the partial occupancy of the methyl carbon bound to lanthanum that results from the formation of  $\text{La}(\text{SAr}^{i\text{Pr6}})_2$ , **2**, under the conditions of the diffraction experiment.

|                                                |                                                                 |
|------------------------------------------------|-----------------------------------------------------------------|
| Empirical formula                              | $\text{LaS}_2\text{C}_{75.87}\text{H}_{107.61}$                 |
| Formula weight                                 | 1222.69                                                         |
| Temperature/K                                  | 101.00                                                          |
| Crystal system                                 | monoclinic                                                      |
| Space group                                    | C2/c                                                            |
| a/Å                                            | 21.1776(11)                                                     |
| b/Å                                            | 18.2359(10)                                                     |
| c/Å                                            | 36.0813(19)                                                     |
| $\alpha/^\circ$                                | 90                                                              |
| $\beta/^\circ$                                 | 91.179(2)                                                       |
| $\gamma/^\circ$                                | 90                                                              |
| Volume/Å <sup>3</sup>                          | 13931.4(13)                                                     |
| Z                                              | 8                                                               |
| $\rho_{\text{calc}}/\text{g}/\text{cm}^3$      | 1.166                                                           |
| $\mu/\text{mm}^{-1}$                           | 5.578                                                           |
| F(000)                                         | 5215.0                                                          |
| Crystal size/mm <sup>3</sup>                   | 0.155 × 0.151 × 0.138                                           |
| Radiation                                      | CuK $\alpha$ ( $\lambda$ = 1.54178)                             |
| 2 $\theta$ range for data collection/ $^\circ$ | 4.9 to 155.186                                                  |
| Index ranges                                   | -26 ≤ h ≤ 25, -23 ≤ k ≤ 23, -45 ≤ l ≤ 45                        |
| Reflections collected                          | 125351                                                          |
| Independent reflections                        | 14771 [ $R_{\text{int}}$ = 0.0602, $R_{\text{sigma}}$ = 0.0317] |
| Data/restraints/parameters                     | 14771/0/793                                                     |
| Goodness-of-fit on F <sup>2</sup>              | 1.178                                                           |
| Final R indexes [ $ I  \geq 2\sigma(I)$ ]      | $R_1$ = 0.0444, $wR_2$ = 0.1064                                 |
| Final R indexes [all data]                     | $R_1$ = 0.0448, $wR_2$ = 0.1066                                 |
| Largest diff. peak/hole / e Å <sup>-3</sup>    | 0.54/-0.64                                                      |

**X-ray Data Collection, Structure Solution and Refinement for  $\text{La}(\text{SAr}^{i\text{Pr}_6})_2\text{CH}_3 \cdot 0.5(\text{C}_6\text{H}_{14})$ , 1 · 0.5( $\text{C}_6\text{H}_{14}$ ) After Experiment 1 (5 h of X-ray Irradiation).**

A yellow crystal of approximate dimensions 0.138 x 0.151 x 0.155 mm was mounted in a cryoloop and transferred to a Bruker D8 Venture diffractometer system. The APEX5<sup>5</sup> program package was used to determine the unit-cell parameters and for data collection (1-5 sec/frame scan time). The raw frame data was processed using SAINT<sup>6</sup> and SADABS<sup>7</sup> to yield the reflection data file. Subsequent calculations were carried out using the SHELXTL<sup>8</sup> program package. The diffraction symmetry was  $2/m$  and the systematic absences were consistent with the monoclinic space groups  $Cc$  and  $C2/c$ . It was later determined that space group  $C2/c$  was correct.

The structure was solved by direct methods and refined on  $F^2$  by full-matrix least-squares techniques. The analytical scattering factors<sup>9</sup> for neutral atoms were used throughout the analysis. Hydrogen atoms were included using a riding model. The occupancies of the La, La1, and C1 atoms were first refined freely until a stable model was obtained and then the occupancies of the La1 and C1 atoms were fixed to the occupancy of the freely refined C1 atom and rounded to the nearest hundredth (0.87). The occupancy of La1A was then fixed to the remaining balance (0.13). The disordered C21 atom (isopropyl group) was included using two components with partial site occupancy factors. Least-squares analysis yielded  $wR_2 = 0.1066$  and  $\text{Goof} = 1.178$  for 793 variables refined against 14771 data (0.79 Å),  $R_1 = 0.0444$  for those 14605 data with  $I > 2.0\sigma(I)$ .

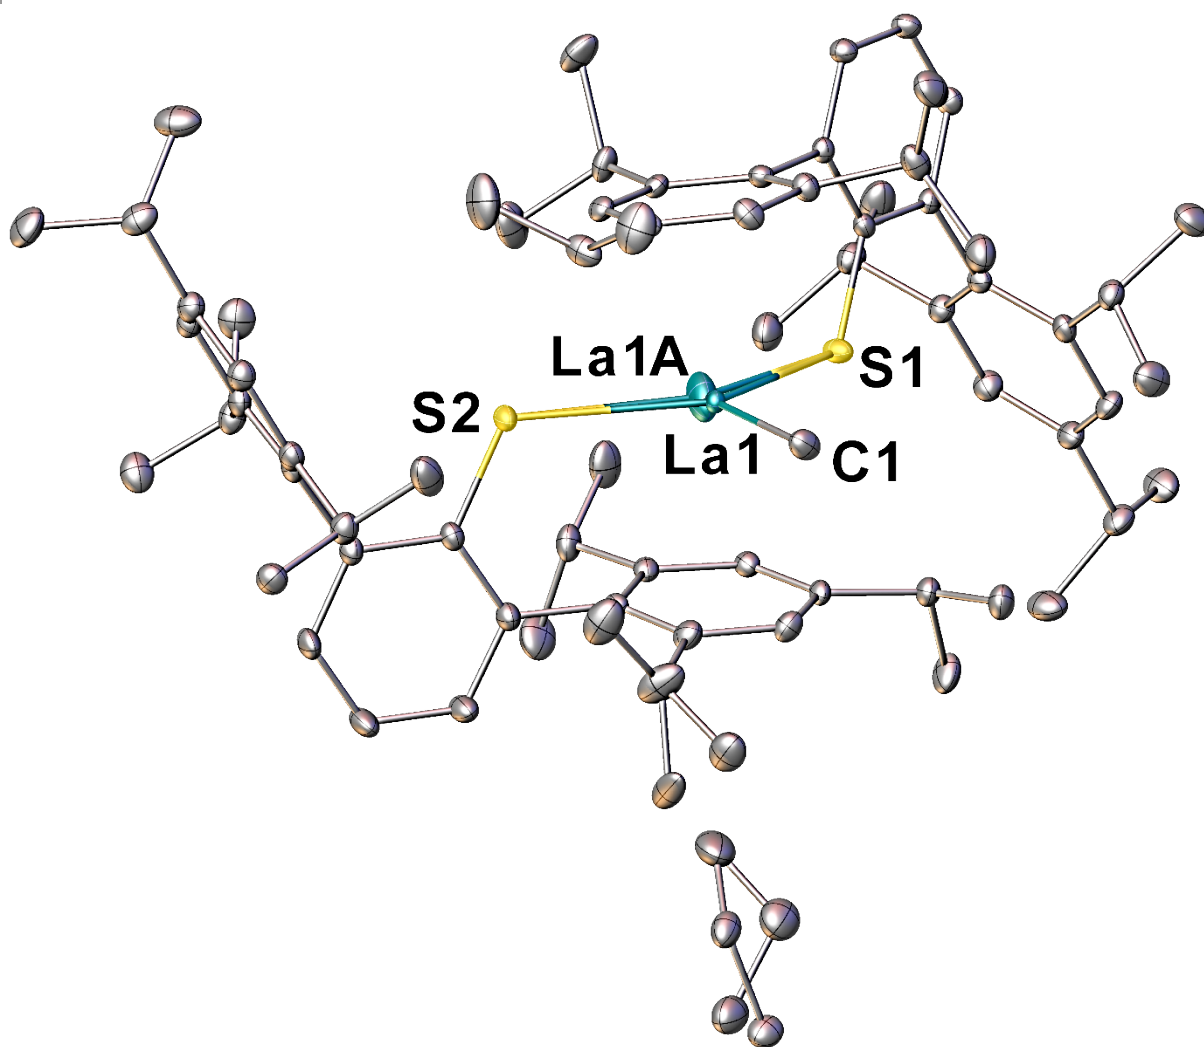

**Figure S1.** The molecular structure of  $\text{La}(\text{SAr}^{i\text{Pr}6})_2\text{CH}_3$ , **1**, showing the conversion of **1** to **2** after a 5 h data collection using Cu K $\alpha$  X-rays. Hydrogen atoms are not shown. The occupancies of La1 and C1 are 87%, while the occupancy of La1A is 13%.

**Table S2.** X-ray data collection parameters and crystallographic details for  $\text{La}(\text{SAr}^{i\text{Pr6}})_2\text{CH}_3 \cdot 0.5(\text{C}_6\text{H}_{14})$ , **1** · **0.5(C<sub>6</sub>H<sub>14</sub>)**, after experiment 2 (10 Hours of X-ray Irradiation).

Note: Fractional values for C and H are given in the following formula due to the partial occupancy of the methyl carbon bound to lanthanum that results from the formation of  $\text{La}(\text{SAr}^{i\text{Pr6}})_2$ , **2**, under the conditions of the diffraction experiment.

|                                                |                                                                 |
|------------------------------------------------|-----------------------------------------------------------------|
| Empirical formula                              | $\text{C}_{75.73}\text{H}_{107.19}\text{LaS}_2$                 |
| Formula weight                                 | 1220.59                                                         |
| Temperature/K                                  | 100.00                                                          |
| Crystal system                                 | monoclinic                                                      |
| Space group                                    | C2/c                                                            |
| a/Å                                            | 21.1388(8)                                                      |
| b/Å                                            | 18.2563(6)                                                      |
| c/Å                                            | 36.1180(13)                                                     |
| $\alpha/^\circ$                                | 90                                                              |
| $\beta/^\circ$                                 | 91.482(2)                                                       |
| $\gamma/^\circ$                                | 90                                                              |
| Volume/Å <sup>3</sup>                          | 13933.9(9)                                                      |
| Z                                              | 8                                                               |
| $\rho_{\text{calc}}/\text{g}/\text{cm}^3$      | 1.164                                                           |
| $\mu/\text{mm}^{-1}$                           | 5.576                                                           |
| F(000)                                         | 5205.0                                                          |
| Crystal size/mm <sup>3</sup>                   | 0.155 × 0.151 × 0.138                                           |
| Radiation                                      | CuK $\alpha$ ( $\lambda$ = 1.54178)                             |
| 2 $\theta$ range for data collection/ $^\circ$ | 4.894 to 155.342                                                |
| Index ranges                                   | -26 ≤ h ≤ 25, -23 ≤ k ≤ 23, -45 ≤ l ≤ 45                        |
| Reflections collected                          | 144834                                                          |
| Independent reflections                        | 14796 [ $R_{\text{int}}$ = 0.0636, $R_{\text{sigma}}$ = 0.0295] |
| Data/restraints/parameters                     | 14796/84/840                                                    |
| Goodness-of-fit on $F^2$                       | 1.197                                                           |
| Final R indexes [ $I \geq 2\sigma(I)$ ]        | $R_1$ = 0.0524, $wR_2$ = 0.1284                                 |
| Final R indexes [all data]                     | $R_1$ = 0.0529, $wR_2$ = 0.1286                                 |
| Largest diff. peak/hole / e Å <sup>-3</sup>    | 0.78/-0.72                                                      |

**X-ray Data Collection, Structure Solution and Refinement for  $\text{La}(\text{SAr}^{i\text{Pr6}})_2\text{CH}_3 \cdot 0.5(\text{C}_6\text{H}_{14})$ , **1** · **0.5(C<sub>6</sub>H<sub>14</sub>)** After Experiment 2 (10 h of X-ray Irradiation).**

Without disturbing the crystal from Experiment 1, the identical data collection strategy was executed a second time. As described above, the APEX5<sup>5</sup> program package was used to determine the unit-cell parameters and for data collection (1-5 sec/frame scan time). The raw frame data was processed using SAINT<sup>6</sup> and SADABS<sup>7</sup> to yield the reflection data file. Subsequent calculations were carried out using the SHELXTL<sup>8</sup> program package. The diffraction symmetry was  $2/m$  and the systematic absences were consistent with the monoclinic space groups  $Cc$  and  $C2/c$ . It was later determined that space group  $C2/c$  was correct.

The structure was solved by direct methods and refined on  $F^2$  by full-matrix least-squares techniques. The analytical scattering factors<sup>9</sup> for neutral atoms were used throughout the analysis. The occupancies of the La, La1, and C1 atoms were first refined freely until a stable model was obtained and then the occupancies of the La1 and C1 atoms were fixed to the occupancy of the freely refined C1 atom and rounded to the nearest hundredth (0.73). The occupancy of La1A was then fixed to the remaining balance (0.27). Further disorder related to the conversion of **1** to **2** was modeled using the same ratio of occupancies. Least-squares analysis yielded  $wR_2 = 0.1286$  and Goof = 1.197 for 840 variables refined against 14796 data (0.79 Å),  $R1 = 0.0524$  for those 14518 data with  $I > 2.0\sigma(I)$ .

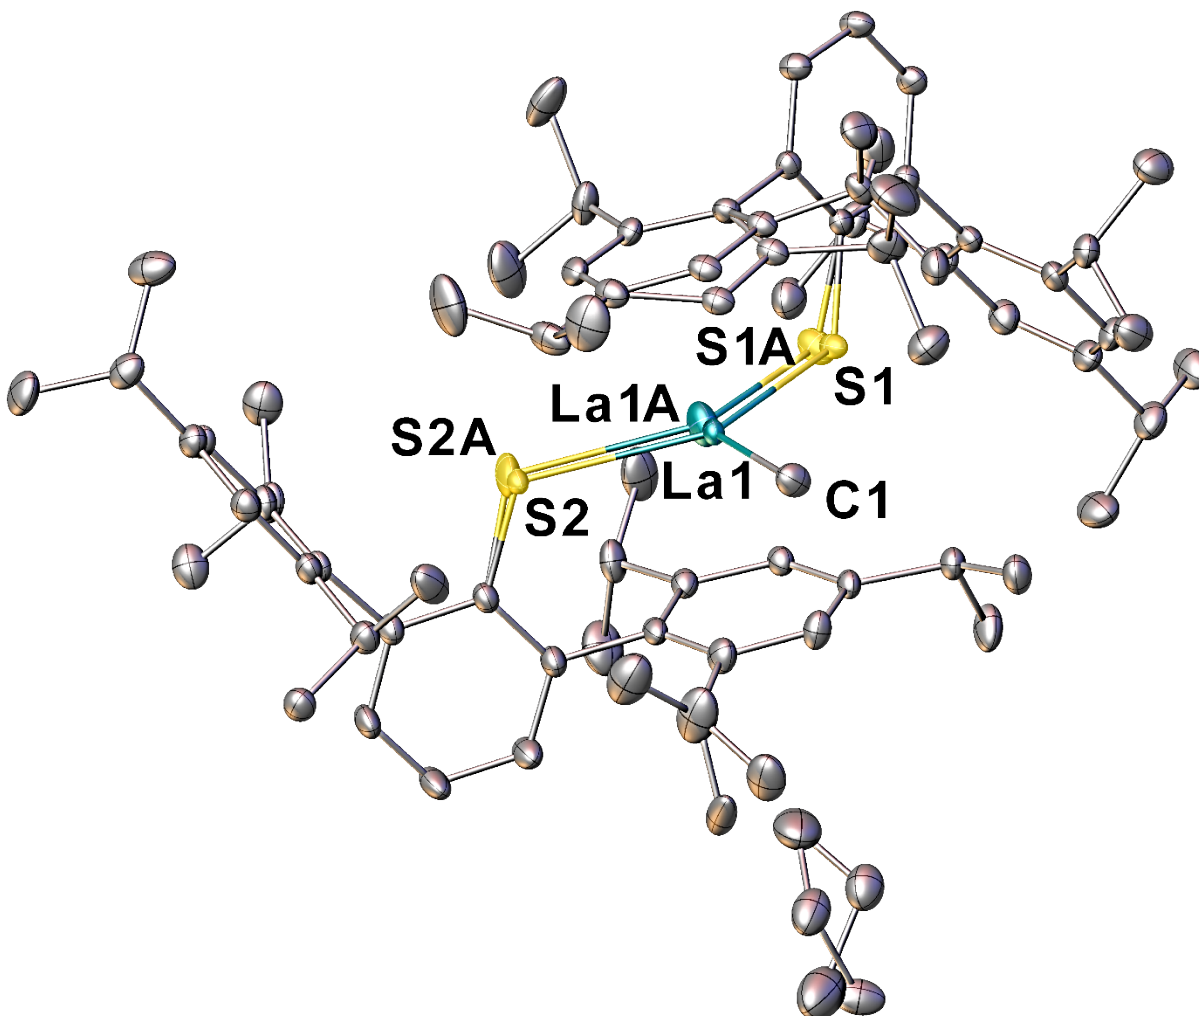

**Figure S2.** The molecular structure of  $\text{La}(\text{SAr}^{\text{Pr}^6})_2\text{CH}_3$ , **1**, showing the conversion of **1** to **2** after 10 h of data collection using Cu K $\alpha$  X-rays. Hydrogen atoms are not shown. The occupancies of La1, C1, S1, and S2 are 78%, while the occupancies of La1A, S1A, and S2A are 22%. The occupancies of the affected carbons of the disordered flanking ring have been fixed to the same ratio in the model.



**Table S3.** X-ray data collection parameters and crystallographic details for  $\text{La}(\text{SAr}^{i\text{Pr6}})_2\text{CH}_3 \cdot 0.5(\text{C}_6\text{H}_{14})$ , **1** · **0.5(C<sub>6</sub>H<sub>14</sub>)**, after Experiment 3 (15 Hours of X-ray Irradiation).

Note: Fractional values for C and H are given in the following formula due to the partial occupancy of the methyl carbon bound to lanthanum that results from the formation of  $\text{La}(\text{SAr}^{i\text{Pr6}})_2$ , **2**, under the conditions of the diffraction experiment.

|                                                |                                                                 |
|------------------------------------------------|-----------------------------------------------------------------|
| Empirical formula                              | $\text{LaS}_2\text{C}_{75.63}\text{H}_{106.89}$                 |
| Formula weight                                 | 1219.08                                                         |
| Temperature/K                                  | 100.00                                                          |
| Crystal system                                 | monoclinic                                                      |
| Space group                                    | C2/c                                                            |
| a/Å                                            | 21.1136(7)                                                      |
| b/Å                                            | 18.2758(6)                                                      |
| c/Å                                            | 36.1580(13)                                                     |
| $\alpha/^\circ$                                | 90                                                              |
| $\beta/^\circ$                                 | 91.790(2)                                                       |
| $\gamma/^\circ$                                | 90                                                              |
| Volume/Å <sup>3</sup>                          | 13945.4(8)                                                      |
| Z                                              | 8                                                               |
| $\rho_{\text{calc}}/\text{g}/\text{cm}^3$      | 1.161                                                           |
| $\mu/\text{mm}^{-1}$                           | 5.571                                                           |
| F(000)                                         | 5197.0                                                          |
| Crystal size/mm <sup>3</sup>                   | 0.155 × 0.151 × 0.138                                           |
| Radiation                                      | CuK $\alpha$ ( $\lambda$ = 1.54178)                             |
| 2 $\theta$ range for data collection/ $^\circ$ | 4.89 to 155.044                                                 |
| Index ranges                                   | -26 ≤ h ≤ 25, -23 ≤ k ≤ 23, -45 ≤ l ≤ 45                        |
| Reflections collected                          | 142504                                                          |
| Independent reflections                        | 14804 [ $R_{\text{int}}$ = 0.0652, $R_{\text{sigma}}$ = 0.0318] |
| Data/restraints/parameters                     | 14804/189/908                                                   |
| Goodness-of-fit on F <sup>2</sup>              | 1.225                                                           |
| Final R indexes [ $I \geq 2\sigma(I)$ ]        | $R_1$ = 0.0592, $wR_2$ = 0.1383                                 |
| Final R indexes [all data]                     | $R_1$ = 0.0605, $wR_2$ = 0.1389                                 |
| Largest diff. peak/hole / e Å <sup>-3</sup>    | 0.46/-0.72                                                      |



**X-ray Data Collection, Structure Solution and Refinement for  $\text{La}(\text{SAr}^{i\text{Pr}_6})_2\text{CH}_3 \cdot 0.5(\text{C}_6\text{H}_{14})$ , **1** ·  $(\text{C}_6\text{H}_{14})$  After Experiment 3 (15 h of X-ray Irradiation).**

Without disturbing the crystal from Experiments 1 and 2, the identical data collection strategy was executed a third time. As described above, the APEX5<sup>5</sup> program package was used to determine the unit-cell parameters and for data collection (1-5 sec/frame scan time). The raw frame data was processed using SAINT<sup>6</sup> and SADABS<sup>7</sup> to yield the reflection data file. Subsequent calculations were carried out using the SHELXTL<sup>8</sup> program package. The diffraction symmetry was  $2/m$  and the systematic absences were consistent with the monoclinic space groups  $Cc$  and  $C2/c$ . It was later determined that space group  $C2/c$  was correct.

The structure was solved by direct methods and refined on  $F^2$  by full-matrix least-squares techniques. The analytical scattering factors<sup>9</sup> for neutral atoms were used throughout the analysis. Hydrogen atoms were included using a riding model. The occupancies of the La, La1, and C1 atoms were first refined freely until a stable model was obtained and then the occupancies of the La1 and C1 atoms were fixed to the occupancy of the freely refined C1 atom and rounded to the nearest hundredth (0.63). The occupancy of La1A was then fixed to the remaining balance (0.37). Further disorder related to the conversion of **1** to **2** was modeled using the same ratio of occupancies. Least-squares analysis yielded  $wR_2 = 0.1389$  and  $\text{Goof} = 1.225$  for 908 variables refined against 14804 data ( $0.79 \text{ \AA}$ ),  $R1 = 0.0592$  for those 14308 data with  $I > 2.0\sigma(I)$ .

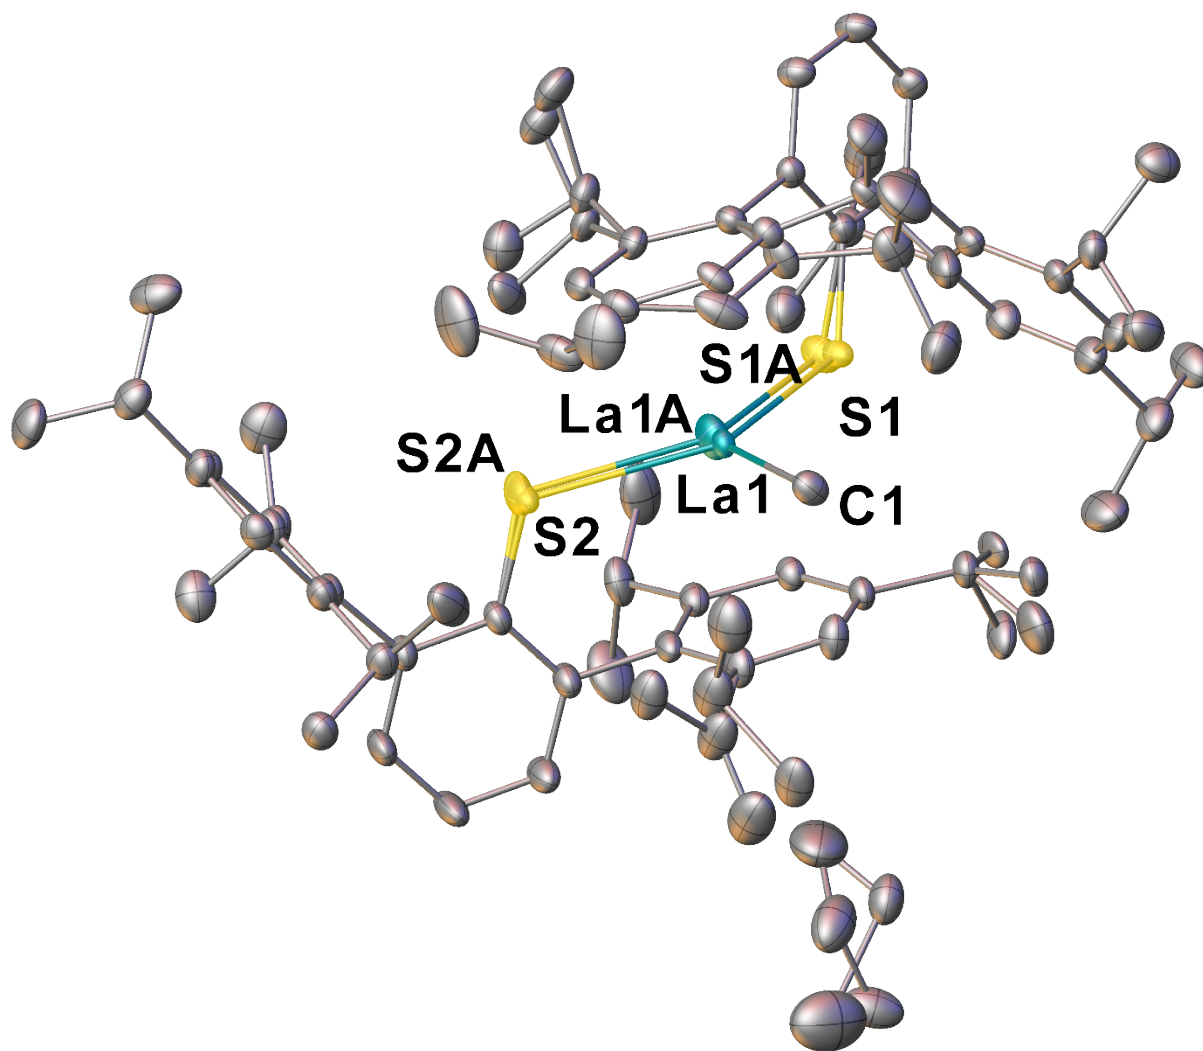

**Figure S3.** The molecular structure of  $\text{La}(\text{SAr}^{i\text{Pr}6})_2\text{CH}_3$ , **1**, showing the conversion of **1** to **2** after 15 h of data collection using Cu K $\alpha$  X-rays. Hydrogen atoms are not shown. The occupancies of La1, C1, S1, and S2 are 65%, while the occupancies of La1A, S1A, and S2A are 35%. The occupancies of the affected carbons of the disordered flanking ring have been fixed to the same ratio in the model.

**Table S4.** X-ray data collection parameters and crystallographic details for  $\text{La}(\text{SAr}^{i\text{Pr6}})_2\text{CH}_3 \cdot 0.5(\text{C}_6\text{H}_{14})$ , **1** · **0.5(C<sub>6</sub>H<sub>14</sub>)**, after Experiment 4 (20 Hours of X-ray Irradiation).

Note: Fractional values for C and H are given in the following formula due to the partial occupancy of the methyl carbon bound to lanthanum that results from the formation of  $\text{La}(\text{SAr}^{i\text{Pr6}})_2$ , **2**, under the conditions of the diffraction experiment.

|                                                |                                                                 |
|------------------------------------------------|-----------------------------------------------------------------|
| Empirical formula                              | $\text{LaS}_2\text{C}_{75.53}\text{H}_{106.59}$                 |
| Formula weight                                 | 1217.58                                                         |
| Temperature/K                                  | 100.00                                                          |
| Crystal system                                 | monoclinic                                                      |
| Space group                                    | C2/c                                                            |
| a/Å                                            | 21.0895(8)                                                      |
| b/Å                                            | 18.2926(6)                                                      |
| c/Å                                            | 36.1914(16)                                                     |
| $\alpha/^\circ$                                | 90                                                              |
| $\beta/^\circ$                                 | 92.017(2)                                                       |
| $\gamma/^\circ$                                | 90                                                              |
| Volume/Å <sup>3</sup>                          | 13953.3(9)                                                      |
| Z                                              | 8                                                               |
| $\rho_{\text{calc}}/\text{g}/\text{cm}^3$      | 1.159                                                           |
| $\mu/\text{mm}^{-1}$                           | 5.567                                                           |
| F(000)                                         | 5190.0                                                          |
| Crystal size/mm <sup>3</sup>                   | 0.155 × 0.151 × 0.138                                           |
| Radiation                                      | CuK $\alpha$ ( $\lambda$ = 1.54178)                             |
| 2 $\theta$ range for data collection/ $^\circ$ | 4.886 to 155.508                                                |
| Index ranges                                   | -26 ≤ h ≤ 25, -23 ≤ k ≤ 23, -45 ≤ l ≤ 45                        |
| Reflections collected                          | 139288                                                          |
| Independent reflections                        | 14812 [ $R_{\text{int}}$ = 0.0686, $R_{\text{sigma}}$ = 0.0348] |
| Data/restraints/parameters                     | 14812/210/918                                                   |
| Goodness-of-fit on F <sup>2</sup>              | 1.201                                                           |
| Final R indexes [ $I \geq 2\sigma(I)$ ]        | $R_1$ = 0.0699, $wR_2$ = 0.1628                                 |
| Final R indexes [all data]                     | $R_1$ = 0.0720, $wR_2$ = 0.1637                                 |
| Largest diff. peak/hole / e Å <sup>-3</sup>    | 0.53/-0.72                                                      |

**X-ray Data Collection, Structure Solution and Refinement for  $\text{La}(\text{SAr}^{i\text{Pr}_6})_2\text{CH}_3 \cdot 0.5(\text{C}_6\text{H}_{14})$ , **1** · **0.5(C<sub>6</sub>H<sub>14</sub>)** After Experiment 4 (20 h of X-ray Irradiation).**

Without disturbing the crystal from Experiments 1-3, the identical data collection strategy was executed a fourth time. As described above, the APEX5<sup>5</sup> program package was used to determine the unit-cell parameters and for data collection (1-5 sec/frame scan time). The raw frame data was processed using SAINT<sup>6</sup> and SADABS<sup>7</sup> to yield the reflection data file. Subsequent calculations were carried out using the SHELXTL<sup>8</sup> program package. The diffraction symmetry was  $2/m$  and the systematic absences were consistent with the monoclinic space groups  $Cc$  and  $C2/c$ . It was later determined that space group  $C2/c$  was correct.

The structure was solved by direct methods and refined on  $F^2$  by full-matrix least-squares techniques. The analytical scattering factors<sup>9</sup> for neutral atoms were used throughout the analysis. Hydrogen atoms were included using a riding model. The occupancies of the La, La1, and C1 atoms were first refined freely until a stable model was obtained and then the occupancies of the La1 and C1 atoms were fixed to the occupancy of the freely refined C1 atom and rounded to the nearest hundredth (0.53). The occupancy of La1A was then fixed to the remaining balance (0.47). Further disorder related to the conversion of **1** to **2** was modeled using the same ratio of occupancies. Least-squares analysis yielded  $wR_2 = 0.1637$  and  $\text{Goof} = 1.201$  for 918 variables refined against 14812 data ( $0.79 \text{ \AA}$ ),  $R1 = 0.0699$  for those 14059 data with  $I > 2.0\sigma(I)$ .

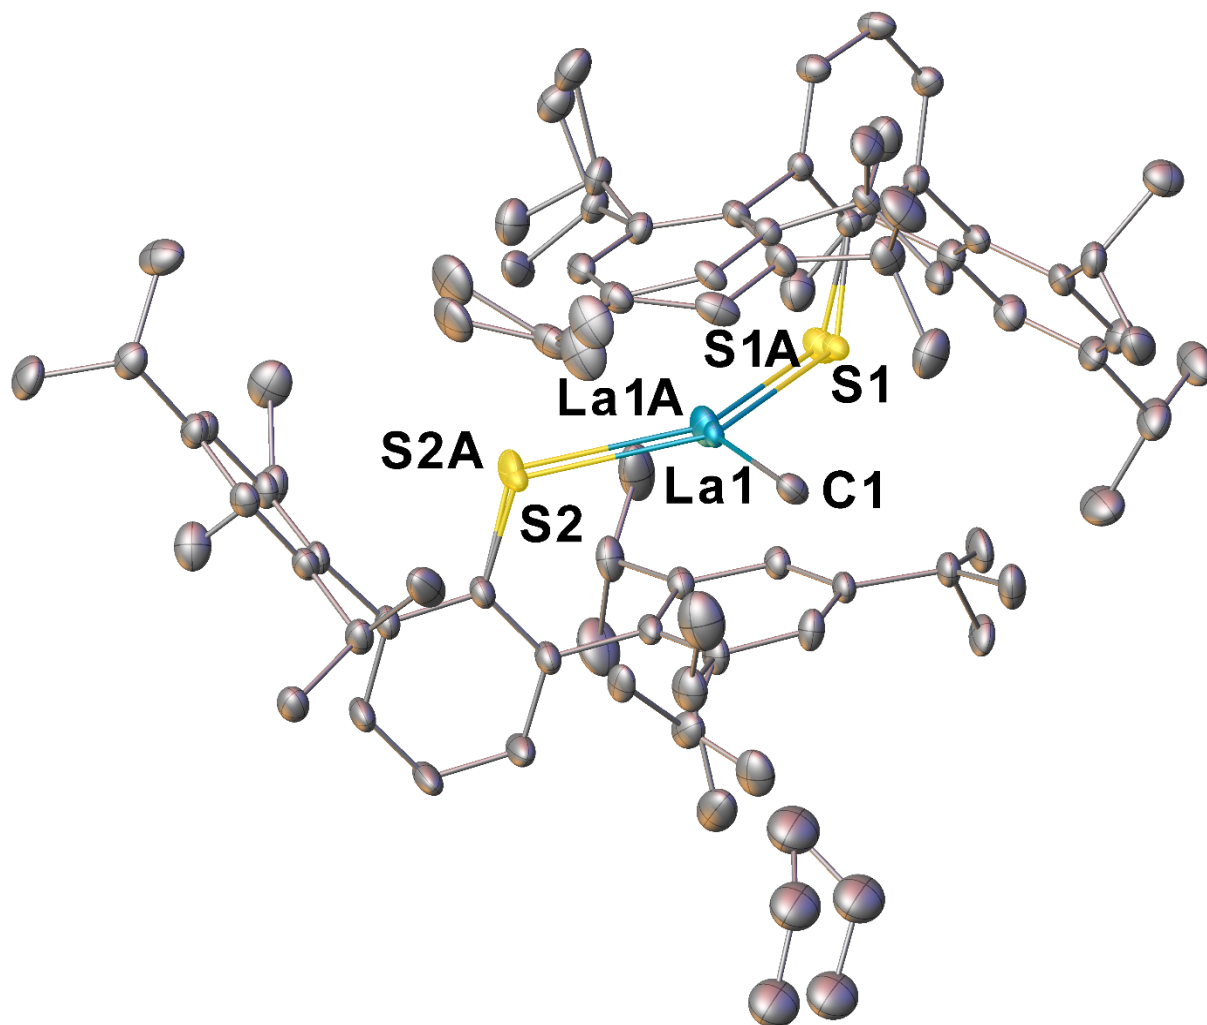

**Figure S4.** The molecular structure of  $\text{La}(\text{SAr}^{i\text{Pr}_6})_2\text{CH}_3$ , **1**, showing the conversion of **1** to **2** after 20 h of data collection using Cu K $\alpha$  X-rays. Hydrogen atoms are not shown. The occupancies of La1, C1, S1, and S2 are 53%, while the occupancies of La1A, S1A, and S2A are 47%. The occupancies of the affected carbons of the disordered flanking ring have been fixed to the same ratio in the model.

**Table S5.** X-ray data collection parameters and crystallographic details for a second crystal of  $\text{La}(\text{SAr}^{i\text{Pr6}})_2\text{CH}_3 \cdot 0.5(\text{C}_6\text{H}_{14})$ , **1 · 0.5(C<sub>6</sub>H<sub>14</sub>)**. These data were collected using Mo K $\alpha$  X-rays.

|                                                |                                                                 |
|------------------------------------------------|-----------------------------------------------------------------|
| Empirical formula                              | C <sub>76</sub> H <sub>108</sub> LaS <sub>2</sub>               |
| Formula weight                                 | 1224.65                                                         |
| Temperature/K                                  | 100.00                                                          |
| Crystal system                                 | monoclinic                                                      |
| Space group                                    | C2/c                                                            |
| a/Å                                            | 21.1869(7)                                                      |
| b/Å                                            | 18.2236(6)                                                      |
| c/Å                                            | 36.0444(15)                                                     |
| $\alpha/^\circ$                                | 90                                                              |
| $\beta/^\circ$                                 | 91.0380(10)                                                     |
| $\gamma/^\circ$                                | 90                                                              |
| Volume/Å <sup>3</sup>                          | 13914.5(9)                                                      |
| Z                                              | 8                                                               |
| $\rho_{\text{calc}}/\text{cm}^3$               | 1.169                                                           |
| $\mu/\text{mm}^{-1}$                           | 0.713                                                           |
| F(000)                                         | 5224.0                                                          |
| Crystal size/mm <sup>3</sup>                   | 0.122 × 0.088 × 0.081                                           |
| Radiation                                      | MoK $\alpha$ ( $\lambda$ = 0.71073)                             |
| 2 $\theta$ range for data collection/ $^\circ$ | 3.694 to 66.35                                                  |
| Index ranges                                   | -32 ≤ h ≤ 24, -27 ≤ k ≤ 28, -55 ≤ l ≤ 55                        |
| Reflections collected                          | 167876                                                          |
| Independent reflections                        | 26556 [ $R_{\text{int}}$ = 0.0785, $R_{\text{sigma}}$ = 0.0554] |
| Data/restraints/parameters                     | 26556/0/766                                                     |
| Goodness-of-fit on F <sup>2</sup>              | 1.027                                                           |
| Final R indexes [ $ I  \geq 2\sigma(I)$ ]      | $R_1$ = 0.0387, $wR_2$ = 0.0816                                 |
| Final R indexes [all data]                     | $R_1$ = 0.0611, $wR_2$ = 0.0910                                 |
| Largest diff. peak/hole / e Å <sup>-3</sup>    | 0.88/-0.41                                                      |



**X-ray Data Collection, Structure Solution and Refinement for a Second Crystal of  $\text{La}(\text{SAr}^{\text{iPr6}})_2\text{CH}_3 \cdot 0.5(\text{C}_6\text{H}_{14})$ ,  $1 \cdot 0.5(\text{C}_6\text{H}_{14})$  Using Mo K $\alpha$  X-rays.**

As described above, the APEX5<sup>5</sup> program package was used to determine the unit-cell parameters and for data collection (5 sec/frame scan time). The raw frame data was processed using SAINT<sup>6</sup> and SADABS<sup>7</sup> to yield the reflection data file. Subsequent calculations were carried out using the SHELXTL<sup>8</sup> program package. The diffraction symmetry was  $2/m$  and the systematic absences were consistent with the monoclinic space groups  $Cc$  and  $C2/c$ . It was later determined that space group  $C2/c$  was correct.

The structure was solved by direct methods and refined on  $F^2$  by full-matrix least-squares techniques. The analytical scattering factors<sup>9</sup> for neutral atoms were used throughout the analysis. Hydrogen atoms were included using a riding model. Least-squares analysis yielded  $wR_2 = 0.0910$  and  $\text{Goof} = 1.027$  for 766 variables refined against 26556 data ( $0.65 \text{ \AA}$ ),  $R1 = 0.0387$  for those 20217 data with  $I > 2.0\sigma(I)$ .

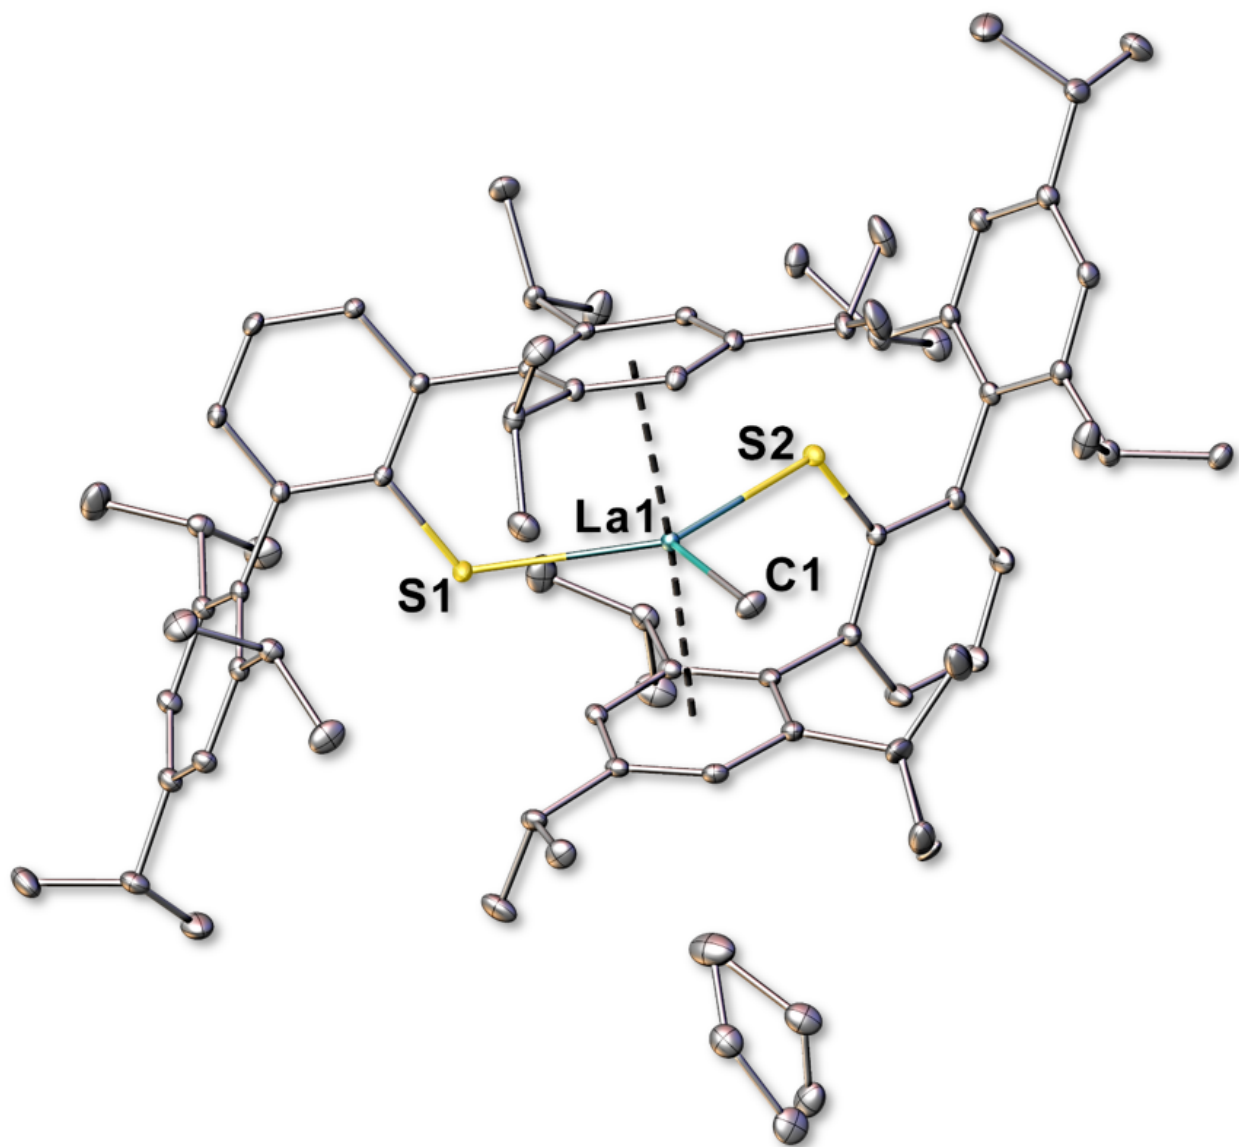

**Figure S5.** The molecular structure of a second crystal of  $\text{La}(\text{SAr}^{i\text{Pr}6})_2\text{CH}_3$ , **1**, determined using Mo  $K\alpha$  X-rays. Thermal ellipsoids are drawn at 30% probability. Hydrogen atoms are not shown.

**Table S6.** X-ray data collection parameters and crystallographic details for a second crystal of  $\text{La}(\text{SAr}^{i\text{Pr6}})_2\text{CH}_3 \cdot 0.5(\text{C}_6\text{H}_{14})$ , **1** · **0.5(C<sub>6</sub>H<sub>14</sub>)**. These data were collected using Cu K $\alpha$  X-rays over a period of 5h and 12 min.

Note: Fractional values for C and H are given in the following formula due to the partial occupancy of the methyl carbon bound to lanthanum that results from the formation of  $\text{La}(\text{SAr}^{i\text{Pr6}})_2$ , **2**, under the conditions of the diffraction experiment.

|                                                |                                                                   |
|------------------------------------------------|-------------------------------------------------------------------|
| Empirical formula                              | $\text{LaS}_2\text{C}_{75.93}\text{H}_{107.71}$                   |
| Formula weight                                 | 1223.51                                                           |
| Temperature/K                                  | 100.00                                                            |
| Crystal system                                 | monoclinic                                                        |
| Space group                                    | C2/c                                                              |
| a/Å                                            | 21.1898(4)                                                        |
| b/Å                                            | 18.2528(3)                                                        |
| c/Å                                            | 36.0951(7)                                                        |
| $\alpha/^\circ$                                | 90                                                                |
| $\beta/^\circ$                                 | 91.1970(10)                                                       |
| $\gamma/^\circ$                                | 90                                                                |
| Volume/Å <sup>3</sup>                          | 13957.6(4)                                                        |
| Z                                              | 8                                                                 |
| $\rho_{\text{calc}}/\text{g/cm}^3$             | 1.164                                                             |
| $\mu/\text{mm}^{-1}$                           | 5.568                                                             |
| F(000)                                         | 5218.0                                                            |
| Crystal size/mm <sup>3</sup>                   | 0.121 × 0.088 × 0.081                                             |
| Radiation                                      | CuK $\alpha$ ( $\lambda = 1.54178$ )                              |
| 2 $\theta$ range for data collection/ $^\circ$ | 6.814 to 158.25                                                   |
| Index ranges                                   | -24 ≤ h ≤ 26, -22 ≤ k ≤ 21, -45 ≤ l ≤ 45                          |
| Reflections collected                          | 106690                                                            |
| Independent reflections                        | 14790 [ $R_{\text{int}} = 0.0592$ , $R_{\text{sigma}} = 0.0335$ ] |
| Data/restraints/parameters                     | 14790/96/840                                                      |
| Goodness-of-fit on $F^2$                       | 1.031                                                             |
| Final R indexes [ $ I  > 2\sigma(I)$ ]         | $R_1 = 0.0321$ , $wR_2 = 0.0764$                                  |
| Final R indexes [all data]                     | $R_1 = 0.0354$ , $wR_2 = 0.0779$                                  |
| Largest diff. peak/hole / e Å <sup>-3</sup>    | 0.51/-0.42                                                        |

**X-ray Data Collection, Structure Solution and Refinement for a Second Crystal of  $\text{La}(\text{SAr}^{\text{iPr6}})_2\text{CH}_3 \cdot 0.5(\text{C}_6\text{H}_{14})$ ,  $1 \cdot 0.5(\text{C}_6\text{H}_{14})$  (5 h and 12 min of X-ray Irradiation with Cu K $\alpha$  X-rays).**

Without disturbing the crystal from the experiment using Mo K $\alpha$  radiation, data were collected again on this crystal using Cu K $\alpha$  X-rays. As described above, the APEX5<sup>5</sup> program package was used to determine the unit-cell parameters and for data collection (4.5 sec/frame scan time). The raw frame data was processed using SAINT<sup>6</sup> and SADABS<sup>7</sup> to yield the reflection data file. Subsequent calculations were carried out using the SHELXTL<sup>8</sup> program package. The diffraction symmetry was  $2/m$  and the systematic absences were consistent with the monoclinic space groups  $Cc$  and  $C2/c$ . It was later determined that space group  $C2/c$  was correct.

The structure was solved by direct methods and refined on F<sup>2</sup> by full-matrix least-squares techniques. The analytical scattering factors<sup>9</sup> for neutral atoms were used throughout the analysis. Hydrogen atoms were included using a riding model. The occupancies of the La, La1, and C1 atoms were first refined freely until a stable model was obtained and then the occupancies of the La1 and C1 atoms were fixed to the occupancy of the freely refined C1 atom and rounded to the nearest hundredth (0.93). The occupancy of La1A was then fixed to the remaining balance (0.07). Further disorder related to the conversion of **1** to **2** was modeled using the same ratio of occupancies. Least-squares analysis yielded  $wR_2 = 0.0779$  and Goof = 1.031 for 840 variables refined against 14790 data (0.79 Å),  $R_1 = 0.0321$  for those 13657 data with  $I > 2.0\sigma(I)$ .

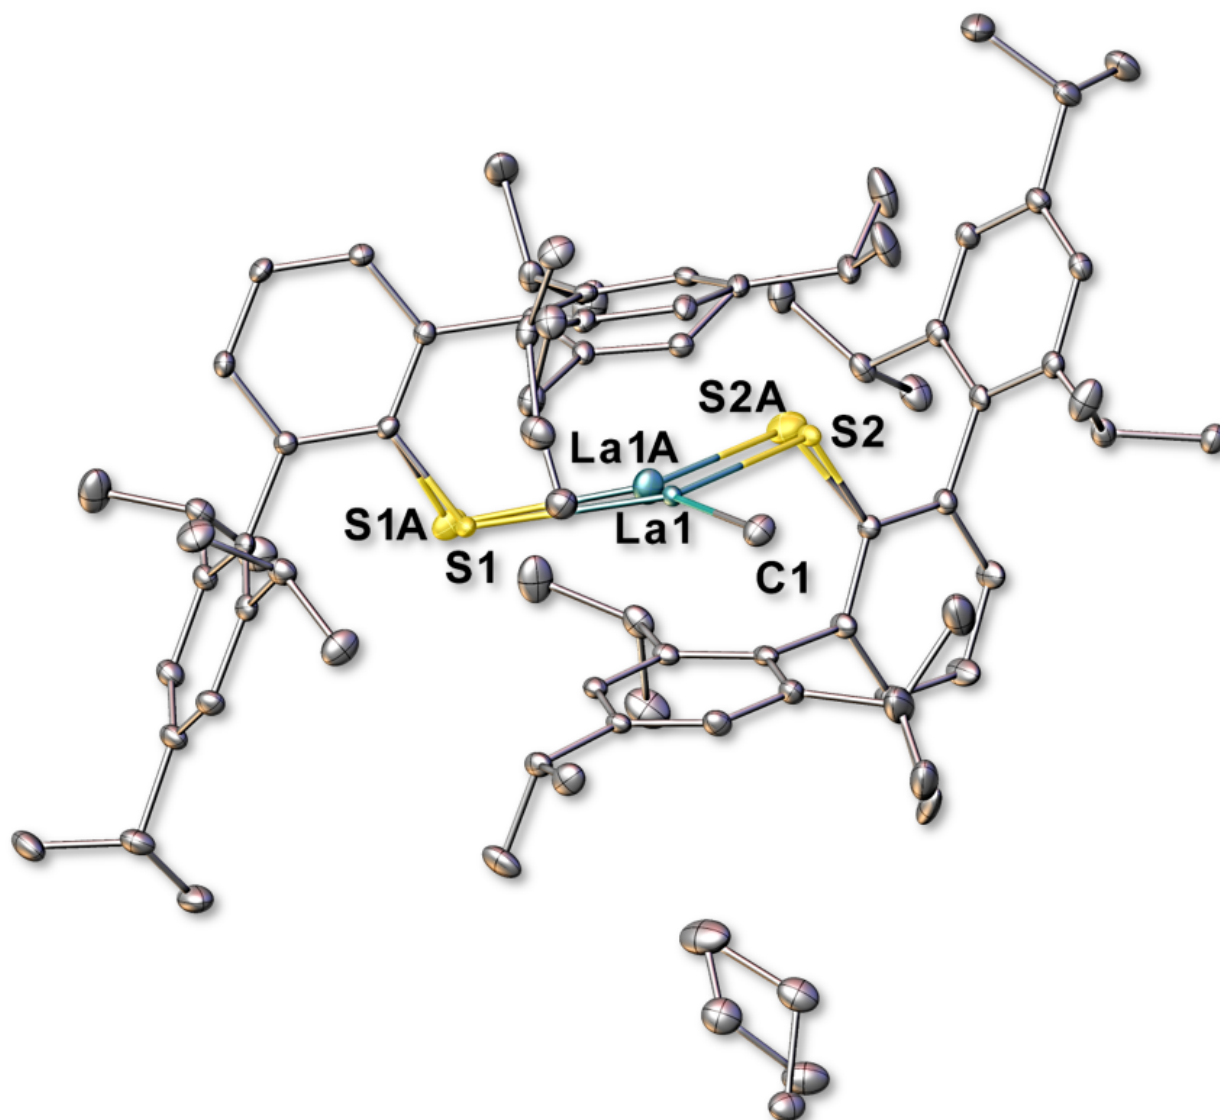

**Figure S6.** The molecular structure of a second crystal of  $\text{La}(\text{SAr}^{\text{Pr}6})_2\text{CH}_3$ , **1**, showing the conversion of **1** to **2** after 5 h and 12 min of data collection using Cu  $\text{K}\alpha$  X-rays. Hydrogen atoms are not shown. The occupancies of La1, C1, S1, and S2 are 93%, while the occupancies of La1A, S1A, and S2A are 7%. The occupancies of the affected carbons of the disordered flanking ring have been fixed to the same ratio in the model.

**Table S7.** X-ray data collection parameters and crystallographic details for a second crystal of  $\text{La}(\text{SAr}^{i\text{Pr6}})_2\text{CH}_3 \cdot 0.5(\text{C}_6\text{H}_{14})$ , **1** · **0.5(C<sub>6</sub>H<sub>14</sub>)**. These data were collected using Cu K $\alpha$  X-rays over a period of 5h and 12 min (total exposure to Cu K $\alpha$  rays of 10h and 24 min).

Note: Fractional values for C and H are given in the following formula due to the partial occupancy of the methyl carbon bound to lanthanum that results from the formation of  $\text{La}(\text{SAr}^{i\text{Pr6}})_2$ , **2**, under the conditions of the diffraction experiment.

|                                                |                                                                 |
|------------------------------------------------|-----------------------------------------------------------------|
| Empirical formula                              | $\text{LaS}_2\text{C}_{75.77}\text{H}_{107.31}$                 |
| Formula weight                                 | 1221.19                                                         |
| Temperature/K                                  | 100.00                                                          |
| Crystal system                                 | monoclinic                                                      |
| Space group                                    | C2/c                                                            |
| a/Å                                            | 21.1612(5)                                                      |
| b/Å                                            | 18.2768(4)                                                      |
| c/Å                                            | 36.1515(9)                                                      |
| $\alpha/^\circ$                                | 90                                                              |
| $\beta/^\circ$                                 | 91.637(2)                                                       |
| $\gamma/^\circ$                                | 90                                                              |
| Volume/Å <sup>3</sup>                          | 13976.2(6)                                                      |
| Z                                              | 8                                                               |
| $\rho_{\text{calc}}/\text{g/cm}^3$             | 1.161                                                           |
| $\mu/\text{mm}^{-1}$                           | 5.559                                                           |
| F(000)                                         | 5207.0                                                          |
| Crystal size/mm <sup>3</sup>                   | 0.115 × 0.097 × 0.082                                           |
| Radiation                                      | CuK $\alpha$ ( $\lambda$ = 1.54178)                             |
| 2 $\theta$ range for data collection/ $^\circ$ | 6.8 to 157.546                                                  |
| Index ranges                                   | -24 ≤ h ≤ 26, -22 ≤ k ≤ 21, -45 ≤ l ≤ 45                        |
| Reflections collected                          | 109125                                                          |
| Independent reflections                        | 14822 [ $R_{\text{int}}$ = 0.0647, $R_{\text{sigma}}$ = 0.0362] |
| Data/restraints/parameters                     | 14822/180/870                                                   |
| Goodness-of-fit on $F^2$                       | 1.070                                                           |
| Final R indexes [ $ I  > 2\sigma(I)$ ]         | $R_1$ = 0.0439, $wR_2$ = 0.1061                                 |
| Final R indexes [all data]                     | $R_1$ = 0.0504, $wR_2$ = 0.1095                                 |
| Largest diff. peak/hole / e Å <sup>-3</sup>    | 0.80/-0.55                                                      |

**X-ray Data Collection, Structure Solution and Refinement for a Second Crystal of  $\text{La}(\text{SAr}^{\text{Pr6}})_2\text{CH}_3 \cdot 0.5(\text{C}_6\text{H}_{14})$ ,  $1 \cdot 0.5(\text{C}_6\text{H}_{14})$  (10 h and 24 min of X-ray Irradiation with Cu K $\alpha$  X-rays).**

Without disturbing the crystal from the prior experiment, data were collected again on this crystal using Cu K $\alpha$  X-rays. As described above, the APEX5<sup>5</sup> program package was used to determine the unit-cell parameters and for data collection (4.5 sec/frame scan time). The raw frame data was processed using SAINT<sup>6</sup> and SADABS<sup>7</sup> to yield the reflection data file. Subsequent calculations were carried out using the SHELXTL<sup>8</sup> program package. The diffraction symmetry was  $2/m$  and the systematic absences were consistent with the monoclinic space groups  $Cc$  and  $C2/c$ . It was later determined that space group  $C2/c$  was correct.

The structure was solved by direct methods and refined on  $F^2$  by full-matrix least-squares techniques. The analytical scattering factors<sup>9</sup> for neutral atoms were used throughout the analysis. Hydrogen atoms were included using a riding model. The occupancies of the La, La1, and C1 atoms were first refined freely until a stable model was obtained and then the occupancies of the La1 and C1 atoms were fixed to the occupancy of the freely refined C1 atom and rounded to the nearest hundredth (0.77). The occupancy of La1A was then fixed to the remaining balance (0.23). Further disorder related to the conversion of **1** to **2** was modeled using the same ratio of occupancies. Least-squares analysis yielded  $wR_2 = 0.1095$  and  $\text{Goof} = 1.070$  for 870 variables refined against 14822 data (0.79 Å),  $R_1 = 0.0439$  for those 13185 data with  $I > 2.0\sigma(I)$ .

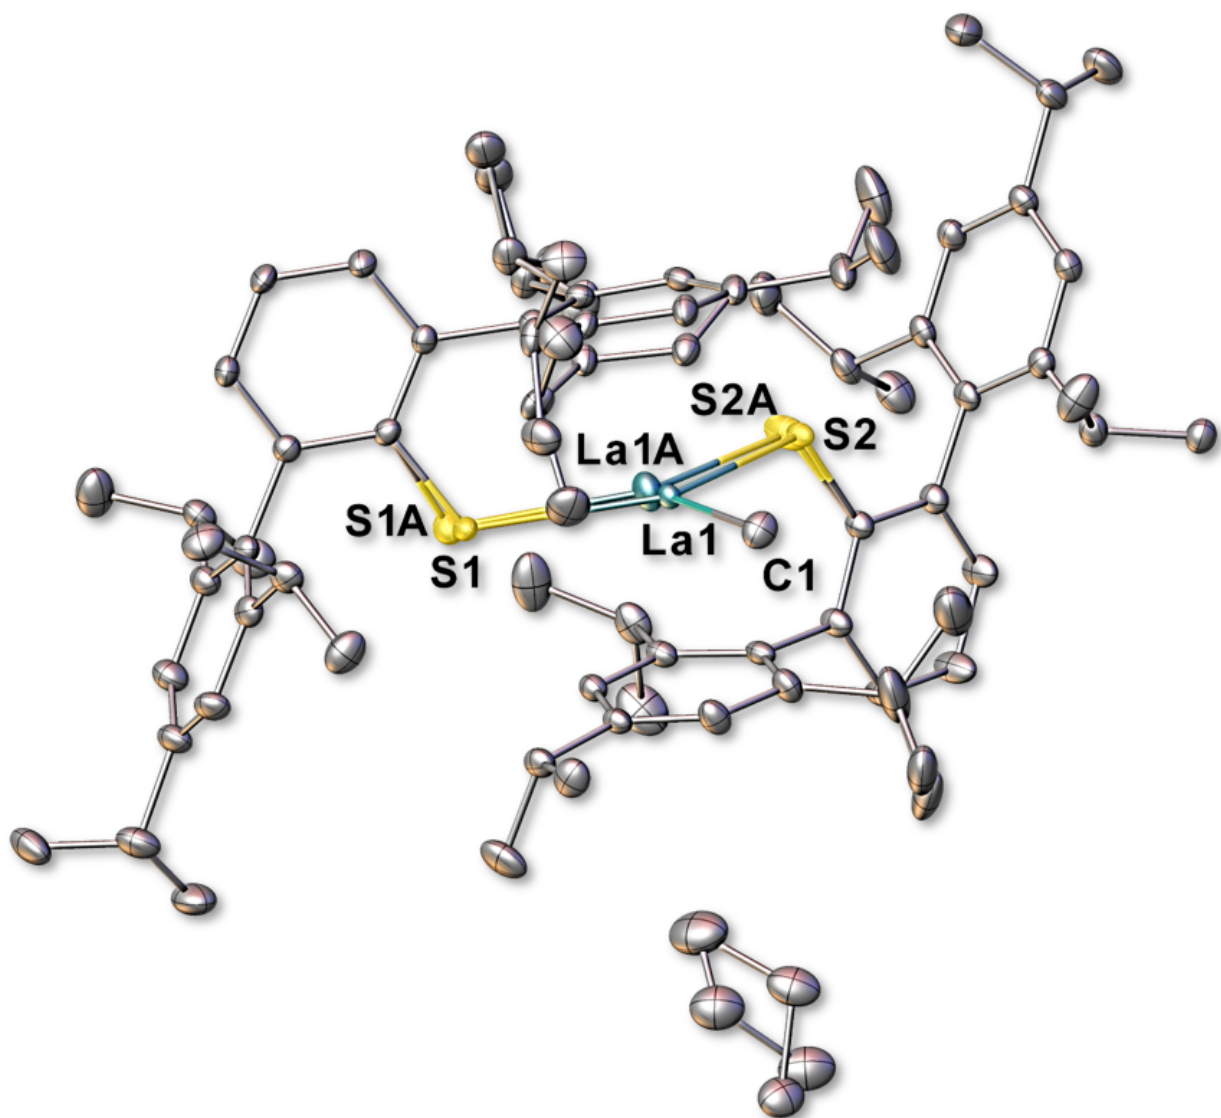

**Figure S7.** The molecular structure of a second crystal of  $\text{La}(\text{SAr}^{i\text{Pr}6})_2\text{CH}_3$ , **1**, showing the conversion of **1** to **2** after 10 h and 24 min of data collection using Cu K $\alpha$  X-rays. Thermal ellipsoids are drawn at 30% probability. Hydrogen atoms are not shown. The occupancies of La1, C1, S1, and S2 are 77%, while the occupancies of La1A, S1A, and S2A are 23%. The occupancies of the affected carbons of the disordered flanking ring have been fixed to the same ratio in the model.



**Table S8.** X-ray data collection parameters and crystallographic details for a second crystal of  $\text{La}(\text{SAr}^{i\text{Pr6}})_2\text{CH}_3 \cdot 0.5(\text{C}_6\text{H}_{14})$ , **1** · **0.5(C<sub>6</sub>H<sub>14</sub>)**. These data were collected using Cu K $\alpha$  X-rays over a period of 5h and 12 min (total exposure to Cu K $\alpha$  rays of 15h and 36 min).

Note: Fractional values for C and H are given in the following formula due to the partial occupancy of the methyl carbon bound to lanthanum that results from the formation of  $\text{La}(\text{SAr}^{i\text{Pr6}})_2$ , **2**, under the conditions of the diffraction experiment.

|                                                |                                                                 |
|------------------------------------------------|-----------------------------------------------------------------|
| Empirical formula                              | $\text{LaS}_2\text{C}_{75.65}\text{H}_{106.95}$                 |
| Formula weight                                 | 1219.39                                                         |
| Temperature/K                                  | 100.00                                                          |
| Crystal system                                 | monoclinic                                                      |
| Space group                                    | C2/c                                                            |
| a/Å                                            | 21.1319(5)                                                      |
| b/Å                                            | 18.3028(4)                                                      |
| c/Å                                            | 36.1912(10)                                                     |
| $\alpha/^\circ$                                | 90                                                              |
| $\beta/^\circ$                                 | 92.051(2)                                                       |
| $\gamma/^\circ$                                | 90                                                              |
| Volume/Å <sup>3</sup>                          | 13988.8(6)                                                      |
| Z                                              | 8                                                               |
| $\rho_{\text{calc}}/\text{g}/\text{cm}^3$      | 1.158                                                           |
| $\mu/\text{mm}^{-1}$                           | 5.554                                                           |
| F(000)                                         | 5199.0                                                          |
| Crystal size/mm <sup>3</sup>                   | 0.116 × 0.09 × 0.087                                            |
| Radiation                                      | CuK $\alpha$ ( $\lambda$ = 1.54178)                             |
| 2 $\theta$ range for data collection/ $^\circ$ | 4.886 to 158.43                                                 |
| Index ranges                                   | -24 ≤ h ≤ 26, -23 ≤ k ≤ 21, -45 ≤ l ≤ 46                        |
| Reflections collected                          | 114278                                                          |
| Independent reflections                        | 14853 [ $R_{\text{int}}$ = 0.0734, $R_{\text{sigma}}$ = 0.0391] |
| Data/restraints/parameters                     | 14853/163/869                                                   |
| Goodness-of-fit on F <sup>2</sup>              | 1.086                                                           |
| Final R indexes [ $ I  > 2\sigma(I)$ ]         | $R_1$ = 0.0567, $wR_2$ = 0.1356                                 |
| Final R indexes [all data]                     | $R_1$ = 0.0688, $wR_2$ = 0.1428                                 |
| Largest diff. peak/hole / e Å <sup>-3</sup>    | 0.97/-0.62                                                      |



**X-ray Data Collection, Structure Solution and Refinement for a Second Crystal of  $\text{La}(\text{SAr}^{\text{Pr6}})_2\text{CH}_3 \cdot 0.5(\text{C}_6\text{H}_{14})$ ,  $1 \cdot 0.5(\text{C}_6\text{H}_{14})$  (15 h and 36 min of X-ray Irradiation with Cu K $\alpha$  X-rays).**

Without disturbing the crystal from the prior experiment, data were collected again on this crystal using Cu K $\alpha$  X-rays. As described above, the APEX5<sup>5</sup> program package was used to determine the unit-cell parameters and for data collection (4.5 sec/frame scan time). The raw frame data was processed using SAINT<sup>6</sup> and SADABS<sup>7</sup> to yield the reflection data file. Subsequent calculations were carried out using the SHELXTL<sup>8</sup> program package. The diffraction symmetry was  $2/m$  and the systematic absences were consistent with the monoclinic space groups  $Cc$  and  $C2/c$ . It was later determined that space group  $C2/c$  was correct.

The structure was solved by direct methods and refined on  $F^2$  by full-matrix least-squares techniques. The analytical scattering factors<sup>9</sup> for neutral atoms were used throughout the analysis. Hydrogen atoms were included using a riding model. The occupancies of the La, La1, and C1 atoms were first refined freely until a stable model was obtained and then the occupancies of the La1 and C1 atoms were fixed to the occupancy of the freely refined C1 atom and rounded to the nearest hundredth (0.65). The occupancy of La1A was then fixed to the remaining balance (0.35). Further disorder related to the conversion of **1** to **2** was modeled using the same ratio of occupancies. Least-squares analysis yielded  $wR_2 = 0.1428$  and Goof = 1.086 for 869 variables refined against 14853 data (0.79 Å),  $R_1 = 0.0567$  for those 13185 data with  $I > 2.0\sigma(I)$ .

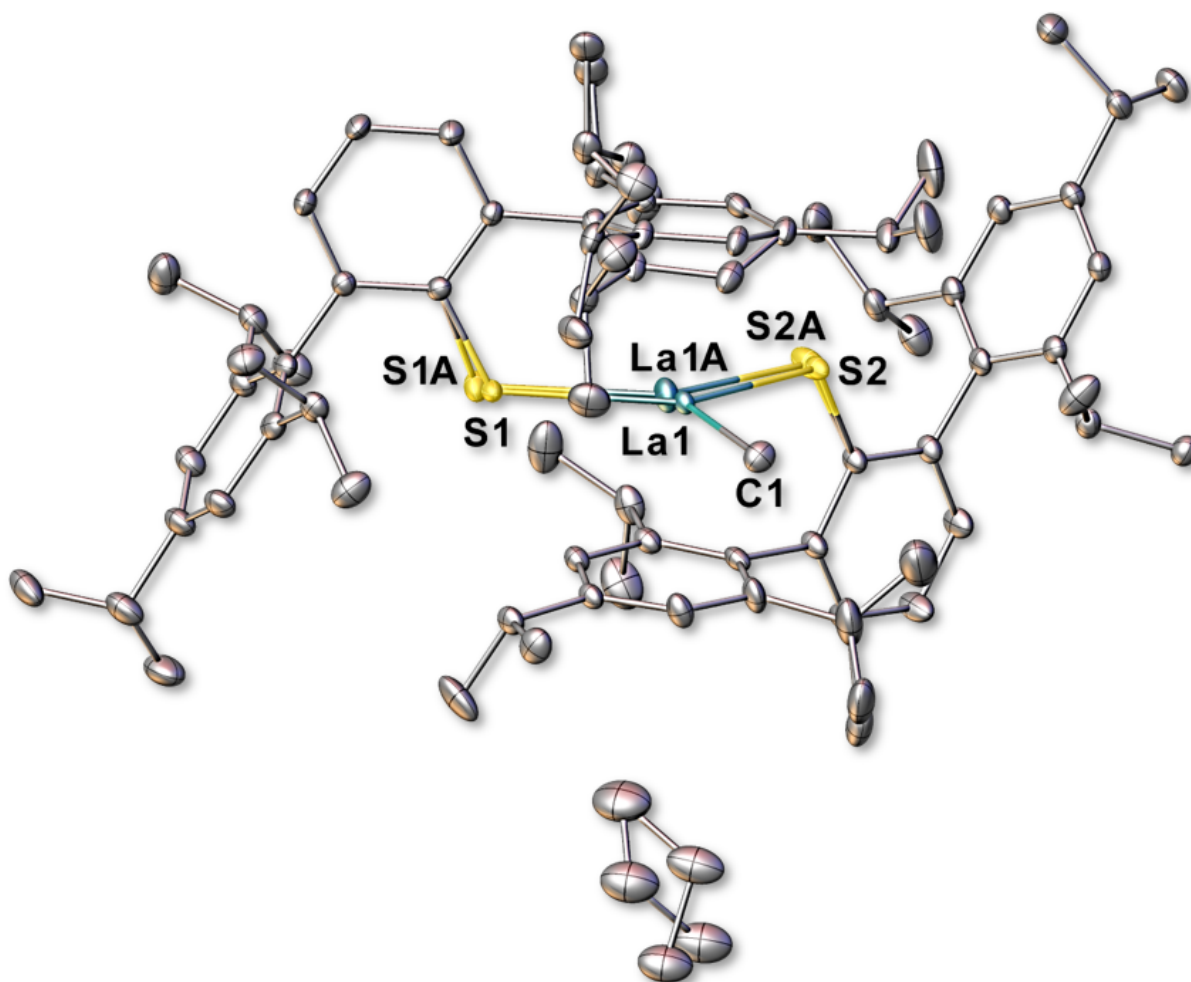

**Figure S8.** The molecular structure of a second crystal of  $\text{La}(\text{SAr}^{i\text{Pr}6})_2\text{CH}_3$ , **1**, showing the conversion of **1** to **2** after 15 h and 36 min of data collection using Cu K $\alpha$  X-rays. Thermal ellipsoids are drawn at 20% probability. Hydrogen atoms are not shown. The occupancies of La1, C1, S1, and S2 are 65%, while the occupancies of La1A, S1A, and S2A are 35%. The occupancies of the affected carbons of the disordered flanking ring have been fixed to the same ratio in the model.

**Table S9.** X-ray data collection parameters and crystallographic details for a second crystal of  $\text{La}(\text{SAr}^{i\text{Pr6}})_2\text{CH}_3 \cdot 0.5(\text{C}_6\text{H}_{14})$ , **1** · **0.5(C<sub>6</sub>H<sub>14</sub>)**. These data were collected using Cu K $\alpha$  X-rays over a period of 5h and 12 min (total exposure to Cu K $\alpha$  rays of 20h and 48 min).

Note: Fractional values for C and H are given in the following formula due to the partial occupancy of the methyl carbon bound to lanthanum that results from the formation of  $\text{La}(\text{SAr}^{i\text{Pr6}})_2$ , **2**, under the conditions of the diffraction experiment.

|                                                |                                                                 |
|------------------------------------------------|-----------------------------------------------------------------|
| Empirical formula                              | $\text{LaS}_2\text{C}_{72.5}\text{H}_{99.5}$                    |
| Formula weight                                 | 1174.05                                                         |
| Temperature/K                                  | 100.00                                                          |
| Crystal system                                 | monoclinic                                                      |
| Space group                                    | C2/c                                                            |
| a/Å                                            | 21.0954(5)                                                      |
| b/Å                                            | 18.3275(4)                                                      |
| c/Å                                            | 36.2468(11)                                                     |
| $\alpha/^\circ$                                | 90                                                              |
| $\beta/^\circ$                                 | 92.474(2)                                                       |
| $\gamma/^\circ$                                | 90                                                              |
| Volume/Å <sup>3</sup>                          | 14000.9(6)                                                      |
| Z                                              | 8                                                               |
| $\rho_{\text{calc}}/\text{g/cm}^3$             | 1.114                                                           |
| $\mu/\text{mm}^{-1}$                           | 5.532                                                           |
| F(000)                                         | 4988.0                                                          |
| Crystal size/mm <sup>3</sup>                   | 0.116 × 0.09 × 0.087                                            |
| Radiation                                      | CuK $\alpha$ ( $\lambda$ = 1.54178)                             |
| 2 $\theta$ range for data collection/ $^\circ$ | 4.88 to 158.508                                                 |
| Index ranges                                   | -23 ≤ h ≤ 26, -23 ≤ k ≤ 21, -45 ≤ l ≤ 46                        |
| Reflections collected                          | 115171                                                          |
| Independent reflections                        | 14947 [ $R_{\text{int}}$ = 0.0880, $R_{\text{sigma}}$ = 0.0460] |
| Data/restraints/parameters                     | 14947/179/855                                                   |
| Goodness-of-fit on $F^2$                       | 1.060                                                           |
| Final R indexes [ $ I  > 2\sigma(I)$ ]         | $R_1$ = 0.0624, $wR_2$ = 0.1388                                 |
| Final R indexes [all data]                     | $R_1$ = 0.0826, $wR_2$ = 0.1491                                 |
| Largest diff. peak/hole / e Å <sup>-3</sup>    | 0.72/-0.49                                                      |



**X-ray Data Collection, Structure Solution and Refinement for a Second Crystal of  $\text{La}(\text{SAr}^{\text{iPr6}})_2\text{CH}_3 \cdot 0.5(\text{C}_6\text{H}_{14})$ ,  $1 \cdot 0.5(\text{C}_6\text{H}_{14})$  (20 h and 48 min of X-ray Irradiation with Cu K $\alpha$  X-rays).**

Without disturbing the crystal from the prior experiment, data were collected again on this crystal using Cu K $\alpha$  X-rays. As described above, the APEX5<sup>5</sup> program package was used to determine the unit-cell parameters and for data collection (4.5 sec/frame scan time). The raw frame data was processed using SAINT<sup>6</sup> and SADABS<sup>7</sup> to yield the reflection data file. Subsequent calculations were carried out using the SHELXTL<sup>8</sup> program package. The diffraction symmetry was  $2/m$  and the systematic absences were consistent with the monoclinic space groups  $Cc$  and  $C2/c$ . It was later determined that space group  $C2/c$  was correct.

The structure was solved by direct methods and refined on  $F^2$  by full-matrix least-squares techniques. The analytical scattering factors<sup>9</sup> for neutral atoms were used throughout the analysis. Hydrogen atoms were included using a riding model. The occupancies of the La, La1, and C1 atoms were first refined freely until a stable model was obtained and then the occupancies of the La1 and C1 atoms were fixed to the occupancy of the freely refined C1 atom and rounded to the nearest hundredth (0.50). The occupancy of La1A was then fixed to the remaining balance (0.50). Further disorder related to the conversion of **1** to **2** was modeled using the same ratio of occupancies. The disordered half molecule of hexane was excluded from refinement using SQUEEZE.<sup>10</sup> Least-squares analysis yielded  $wR_2 = 0.1491$  and  $\text{Goof} = 1.060$  for 855 variables refined against 14947 data ( $0.79 \text{ \AA}$ ),  $R1 = 0.0624$  for those 11267 data with  $I > 2.0\sigma(I)$ .

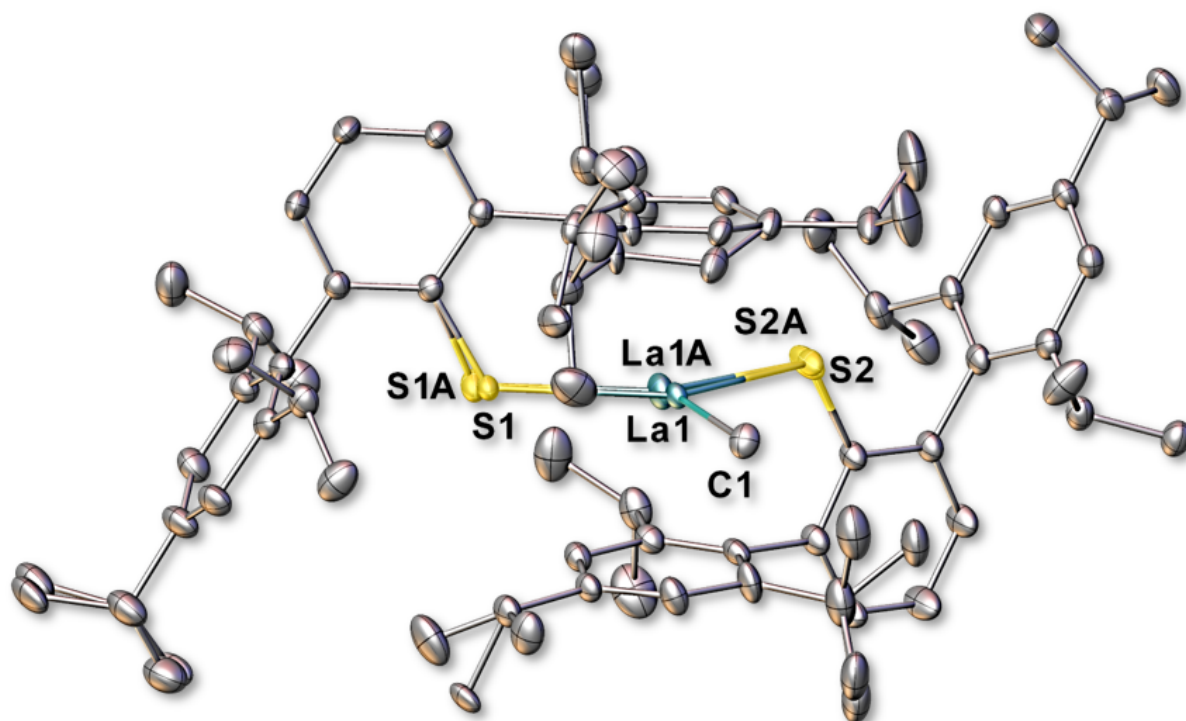

**Figure S9.** The molecular structure of a second crystal of  $\text{La}(\text{SAr}^{i\text{Pr}_6})_2\text{CH}_3$ , **1**, showing the conversion of **1** to **2** after 20 h and 48 min of data collection using Cu K $\alpha$  X-rays. Thermal ellipsoids are drawn at 20% probability. Hydrogen atoms are not shown. The occupancies of La1, C1, S1, and S2 are 50%, while the occupancies of La1A, S1A, and S2A are 50%. The occupancies of the affected carbons of the disordered flanking ring have been fixed to the same ratio in the model.



**Table S10.** X-ray data collection parameters and crystallographic details for a second crystal of  $\text{La}(\text{SAr}^{i\text{Pr6}})_2\text{CH}_3 \cdot 0.5(\text{C}_6\text{H}_{14})$ , **1** · **0.5(C<sub>6</sub>H<sub>14</sub>)**. These data were collected using Cu K $\alpha$  X-rays over a period of 5h and 12 min (total exposure to Cu K $\alpha$  rays of 26 h).

Note: Fractional values for C and H are given in the following formula due to the partial occupancy of the methyl carbon bound to lanthanum that results from the formation of  $\text{La}(\text{SAr}^{i\text{Pr6}})_2$ , **2**, under the conditions of the diffraction experiment.

|                                                |                                                                 |
|------------------------------------------------|-----------------------------------------------------------------|
| Empirical formula                              | $\text{LaS}_2\text{C}_{75.43}\text{H}_{106.29}$                 |
| Formula weight                                 | 1216.08                                                         |
| Temperature/K                                  | 100.00                                                          |
| Crystal system                                 | monoclinic                                                      |
| Space group                                    | C2/c                                                            |
| a/Å                                            | 21.0838(4)                                                      |
| b/Å                                            | 18.3446(3)                                                      |
| c/Å                                            | 36.2906(10)                                                     |
| $\alpha/^\circ$                                | 90                                                              |
| $\beta/^\circ$                                 | 92.716(2)                                                       |
| $\gamma/^\circ$                                | 90                                                              |
| Volume/Å <sup>3</sup>                          | 14020.5(5)                                                      |
| Z                                              | 8                                                               |
| $\rho_{\text{calc}}/\text{g/cm}^3$             | 1.152                                                           |
| $\mu/\text{mm}^{-1}$                           | 5.540                                                           |
| F(000)                                         | 5183.0                                                          |
| Crystal size/mm <sup>3</sup>                   | 0.116 × 0.09 × 0.087                                            |
| Radiation                                      | CuK $\alpha$ ( $\lambda$ = 1.54178)                             |
| 2 $\theta$ range for data collection/ $^\circ$ | 4.876 to 158.176                                                |
| Index ranges                                   | -23 ≤ h ≤ 26, -23 ≤ k ≤ 21, -45 ≤ l ≤ 46                        |
| Reflections collected                          | 111561                                                          |
| Independent reflections                        | 14981 [ $R_{\text{int}}$ = 0.0965, $R_{\text{sigma}}$ = 0.0498] |
| Data/restraints/parameters                     | 14981/331/920                                                   |
| Goodness-of-fit on $F^2$                       | 1.085                                                           |
| Final R indexes [ $ I  > 2\sigma(I)$ ]         | $R_1$ = 0.0650, $wR_2$ = 0.1450                                 |
| Final R indexes [all data]                     | $R_1$ = 0.0991, $wR_2$ = 0.1619                                 |
| Largest diff. peak/hole / e Å <sup>-3</sup>    | 0.56/-0.48                                                      |



**X-ray Data Collection, Structure Solution and Refinement for a Second Crystal of  $\text{La}(\text{SAr}^{\text{iPr6}})_2\text{CH}_3 \cdot 0.5(\text{C}_6\text{H}_{14})$ ,  $1 \cdot 0.5(\text{C}_6\text{H}_{14})$  (26 h of X-ray Irradiation with Cu K $\alpha$  X-rays).**

Without disturbing the crystal from the prior experiment, data were collected again on this crystal using Cu K $\alpha$  X-rays. As described above, the APEX5<sup>5</sup> program package was used to determine the unit-cell parameters and for data collection (4.5 sec/frame scan time). The raw frame data was processed using SAINT<sup>6</sup> and SADABS<sup>7</sup> to yield the reflection data file. Subsequent calculations were carried out using the SHELXTL<sup>8</sup> program package. The diffraction symmetry was  $2/m$  and the systematic absences were consistent with the monoclinic space groups  $Cc$  and  $C2/c$ . It was later determined that space group  $C2/c$  was correct.

The structure was solved by direct methods and refined on  $F^2$  by full-matrix least-squares techniques. The analytical scattering factors<sup>9</sup> for neutral atoms were used throughout the analysis. Hydrogen atoms were included using a riding model. The occupancies of the La, La1, and C1 atoms were first refined freely until a stable model was obtained and then the occupancies of the La1 and C1 atoms were fixed to the occupancy of the freely refined C1 atom and rounded to the nearest hundredth (0.43). The occupancy of La1A was then fixed to the remaining balance (0.57). Further disorder related to the conversion of **1** to **2** was modeled using the same ratio of occupancies. Least-squares analysis yielded  $wR_2 = 0.1619$  and  $\text{Goof} = 1.085$  for 920 variables refined against 14981 data ( $0.79 \text{ \AA}$ ),  $R1 = 0.0650$  for those 10019 data with  $I > 2.0\sigma(I)$ .

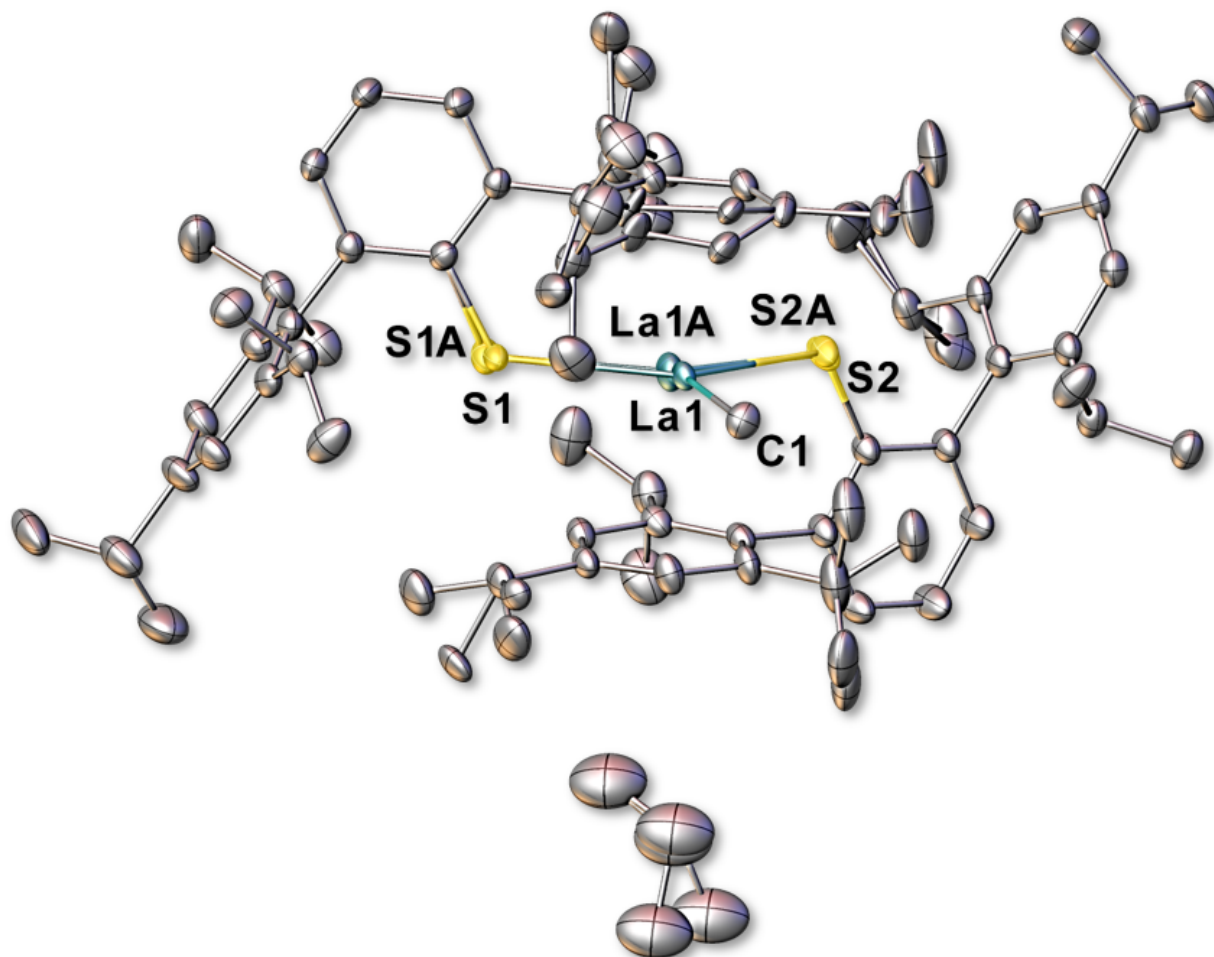

**Figure S10.** The molecular structure of a second crystal of  $\text{La}(\text{SAr}^{i\text{Pr}6})_2\text{CH}_3$ , **1**, showing the conversion of **1** to **2** after 26 h of data collection using Cu K $\alpha$  X-rays. Thermal ellipsoids are drawn at 20% probability. Hydrogen atoms are not shown. The occupancies of La1, C1, S1, and S2 are 43%, while the occupancies of La1A, S1A, and S2A are 57%. The occupancies of the affected carbons of the disordered flanking ring have been fixed to the same ratio in the model.

**Table S11.** X-ray data collection parameters and crystallographic details for a second crystal of  $\text{La}(\text{SAr}^{i\text{Pr6}})_2\text{CH}_3 \cdot 0.5(\text{C}_6\text{H}_{14})$ , **1** · **0.5(C<sub>6</sub>H<sub>14</sub>)**. These data were collected using Cu K $\alpha$  X-rays over a period of 5h and 12 min (total exposure to Cu K $\alpha$  rays of 31 h and 12 min).

Note: Fractional values for C and H are given in the following formula due to the partial occupancy of the methyl carbon bound to lanthanum that results from the formation of  $\text{La}(\text{SAr}^{i\text{Pr6}})_2$ , **2**, under the conditions of the diffraction experiment.

|                                                |                                                                 |
|------------------------------------------------|-----------------------------------------------------------------|
| Empirical formula                              | $\text{LaS}_2\text{C}_{72.36}\text{H}_{99.08}$                  |
| Formula weight                                 | 1171.94                                                         |
| Temperature/K                                  | 100.00                                                          |
| Crystal system                                 | monoclinic                                                      |
| Space group                                    | C2/c                                                            |
| a/Å                                            | 21.0557(7)                                                      |
| b/Å                                            | 18.3608(6)                                                      |
| c/Å                                            | 36.3221(14)                                                     |
| $\alpha/^\circ$                                | 90                                                              |
| $\beta/^\circ$                                 | 92.851(3)                                                       |
| $\gamma/^\circ$                                | 90                                                              |
| Volume/Å <sup>3</sup>                          | 14024.7(8)                                                      |
| Z                                              | 8                                                               |
| $\rho_{\text{calc}}/\text{g/cm}^3$             | 1.110                                                           |
| $\mu/\text{mm}^{-1}$                           | 5.522                                                           |
| F(000)                                         | 4978.0                                                          |
| Crystal size/mm <sup>3</sup>                   | 0.116 × 0.09 × 0.087                                            |
| Radiation                                      | CuK $\alpha$ ( $\lambda$ = 1.54178)                             |
| 2 $\theta$ range for data collection/ $^\circ$ | 4.872 to 159.978                                                |
| Index ranges                                   | -23 ≤ h ≤ 26, -23 ≤ k ≤ 21, -45 ≤ l ≤ 46                        |
| Reflections collected                          | 112266                                                          |
| Independent reflections                        | 14957 [ $R_{\text{int}}$ = 0.1201, $R_{\text{sigma}}$ = 0.0592] |
| Data/restraints/parameters                     | 14957/386/895                                                   |
| Goodness-of-fit on $F^2$                       | 1.038                                                           |
| Final R indexes [ $ I  > 2\sigma(I)$ ]         | $R_1$ = 0.0743, $wR_2$ = 0.1680                                 |
| Final R indexes [all data]                     | $R_1$ = 0.1194, $wR_2$ = 0.1915                                 |
| Largest diff. peak/hole / e Å <sup>-3</sup>    | 0.45/-0.51                                                      |



**X-ray Data Collection, Structure Solution and Refinement for a Second Crystal of  $\text{La}(\text{SAr}^{\text{Pr6}})_2\text{CH}_3 \cdot 0.5(\text{C}_6\text{H}_{14})$ ,  $1 \cdot 0.5(\text{C}_6\text{H}_{14})$  (31 h and 12 min of X-ray Irradiation with Cu K $\alpha$  X-rays).**

Without disturbing the crystal from the prior experiment, data were collected again on this crystal using Cu K $\alpha$  X-rays. As described above, the APEX5<sup>5</sup> program package was used to determine the unit-cell parameters and for data collection (4.5 sec/frame scan time). The raw frame data was processed using SAINT<sup>6</sup> and SADABS<sup>7</sup> to yield the reflection data file. Subsequent calculations were carried out using the SHELXTL<sup>8</sup> program package. The diffraction symmetry was  $2/m$  and the systematic absences were consistent with the monoclinic space groups  $Cc$  and  $C2/c$ . It was later determined that space group  $C2/c$  was correct.

The structure was solved by direct methods and refined on  $F^2$  by full-matrix least-squares techniques. The analytical scattering factors<sup>9</sup> for neutral atoms were used throughout the analysis. Hydrogen atoms were included using a riding model. The occupancies of the La, La1, and C1 atoms were first refined freely until a stable model was obtained and then the occupancies of the La1 and C1 atoms were fixed to the occupancy of the freely refined C1 atom and rounded to the nearest hundredth (0.36). The occupancy of La1A was then fixed to the remaining balance (0.64). Further disorder related to the conversion of **1** to **2** was modeled using the same ratio of occupancies. The disordered half molecule of hexane was excluded from refinement using SQUEEZE.<sup>10</sup> Least-squares analysis yielded  $wR_2 = 0.1915$  and Goof = 1.038 for 895 variables refined against 14957 data (0.79 Å),  $R1 = 0.0743$  for those 8772 data with  $I > 2.0\sigma(I)$ .



**Figure S11.** The molecular structure of a second crystal of  $\text{La}(\text{SAr}^{i\text{Pr}6})_2\text{CH}_3$ , **1**, showing the conversion of **1** to **2** after 31 h and 12 min of data collection using Cu K $\alpha$  X-rays. Thermal ellipsoids are drawn at 20% probability. Hydrogen atoms are not shown. The occupancies of La1, C1, S1, and S2 are 36%, while the occupancies of La1A, S1A, and S2A are 64%. The occupancies of the affected carbons of the disordered flanking ring have been fixed to the same ratio in the model.



**Table S12.** X-ray data collection parameters and crystallographic details for a second crystal of  $\text{La}(\text{SAr}^{i\text{Pr6}})_2\text{CH}_3 \cdot 0.5(\text{C}_6\text{H}_{14})$ , **1** · **0.5(C<sub>6</sub>H<sub>14</sub>)**. These data were collected using Cu K $\alpha$  X-rays over a period of 5h and 12 min (total exposure to Cu K $\alpha$  rays of 36 h and 24 min).

Note: Fractional values for C and H are given in the following formula due to the partial occupancy of the methyl carbon bound to lanthanum that results from the formation of  $\text{La}(\text{SAr}^{i\text{Pr6}})_2$ , **2**, under the conditions of the diffraction experiment.

|                                                |                                                                 |
|------------------------------------------------|-----------------------------------------------------------------|
| Empirical formula                              | $\text{LaS}_2\text{C}_{72.31}\text{H}_{98.93}$                  |
| Formula weight                                 | 1171.19                                                         |
| Temperature/K                                  | 100.00                                                          |
| Crystal system                                 | monoclinic                                                      |
| Space group                                    | C2/c                                                            |
| a/Å                                            | 20.9956(13)                                                     |
| b/Å                                            | 18.3324(12)                                                     |
| c/Å                                            | 36.449(3)                                                       |
| $\alpha/^\circ$                                | 90                                                              |
| $\beta/^\circ$                                 | 93.160(5)                                                       |
| $\gamma/^\circ$                                | 90                                                              |
| Volume/Å <sup>3</sup>                          | 14007.9(16)                                                     |
| Z                                              | 8                                                               |
| $\rho_{\text{calc}}/\text{g/cm}^3$             | 1.111                                                           |
| $\mu/\text{mm}^{-1}$                           | 5.529                                                           |
| F(000)                                         | 4974.0                                                          |
| Crystal size/mm <sup>3</sup>                   | 0.116 × 0.09 × 0.087                                            |
| Radiation                                      | CuK $\alpha$ ( $\lambda$ = 1.54178)                             |
| 2 $\theta$ range for data collection/ $^\circ$ | 4.856 to 159.15                                                 |
| Index ranges                                   | -23 ≤ h ≤ 26, -23 ≤ k ≤ 21, -45 ≤ l ≤ 45                        |
| Reflections collected                          | 101159                                                          |
| Independent reflections                        | 14773 [ $R_{\text{int}}$ = 0.1523, $R_{\text{sigma}}$ = 0.0774] |
| Data/restraints/parameters                     | 14773/502/910                                                   |
| Goodness-of-fit on $F^2$                       | 1.015                                                           |
| Final R indexes [ $ I  > 2\sigma(I)$ ]         | $R_1$ = 0.0746, $wR_2$ = 0.1686                                 |
| Final R indexes [all data]                     | $R_1$ = 0.1461, $wR_2$ = 0.2039                                 |
| Largest diff. peak/hole / e Å <sup>-3</sup>    | 0.39/-0.45                                                      |



**X-ray Data Collection, Structure Solution and Refinement for a Second Crystal of  $\text{La}(\text{SAr}^{\text{Pr6}})_2\text{CH}_3 \cdot 0.5(\text{C}_6\text{H}_{14})$ ,  $1 \cdot 0.5(\text{C}_6\text{H}_{14})$  (36 h and 24 min of X-ray Irradiation with Cu K $\alpha$  X-rays).**

Without disturbing the crystal from the prior experiment, data were collected again on this crystal using Cu K $\alpha$  X-rays. As described above, the APEX5<sup>5</sup> program package was used to determine the unit-cell parameters and for data collection (4.5 sec/frame scan time). The raw frame data was processed using SAINT<sup>6</sup> and SADABS<sup>7</sup> to yield the reflection data file. Subsequent calculations were carried out using the SHELXTL<sup>8</sup> program package. The diffraction symmetry was  $2/m$  and the systematic absences were consistent with the monoclinic space groups  $Cc$  and  $C2/c$ . It was later determined that space group  $C2/c$  was correct.

The structure was solved by direct methods and refined on  $F^2$  by full-matrix least-squares techniques. The analytical scattering factors<sup>9</sup> for neutral atoms were used throughout the analysis. Hydrogen atoms were included using a riding model. The occupancies of the La, La1, and C1 atoms were first refined freely until a stable model was obtained and then the occupancies of the La1 and C1 atoms were fixed to the occupancy of the freely refined C1 atom and rounded to the nearest hundredth (0.31). The occupancy of La1A was then fixed to the remaining balance (0.69). Further disorder related to the conversion of **1** to **2** was modeled using the same ratio of occupancies. The disordered half molecule of hexane was excluded from refinement using SQUEEZE.<sup>10</sup> Least-squares analysis yielded  $wR_2 = 0.1915$  and Goof = 1.038 for 895 variables refined against 14957 data (0.79 Å),  $R1 = 0.0743$  for those 8772 data with  $I > 2.0\sigma(I)$ .

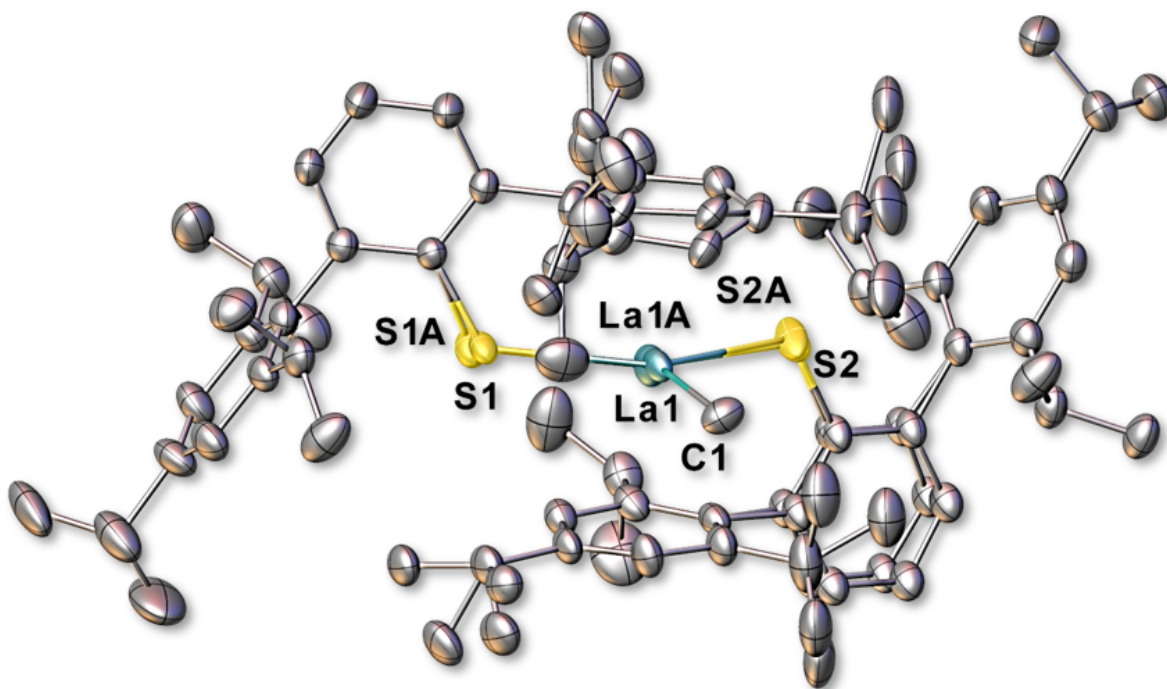

**Figure S12.** The molecular structure of a second crystal of  $\text{La}(\text{SAr}^{i\text{Pr}6})_2\text{CH}_3$ , **1**, showing the conversion of **1** to **2** after 36 h and 24 min of data collection using Cu  $\text{K}\alpha$  X-rays. Thermal ellipsoids are drawn at 20% probability. Hydrogen atoms are not shown. The occupancies of La1, C1, S1, and S2 are 31%, while the occupancies of La1A, S1A, and S2A are 69%. The occupancies of the affected carbons of the disordered flanking ring have been fixed to the same ratio in the model.

**Table S13.** X-ray data collection parameters and crystallographic details for a second crystal of  $\text{La}(\text{SAr}^{i\text{Pr6}})_2\text{CH}_3 \cdot 0.5(\text{C}_6\text{H}_{14})$ , **1** · **0.5(C<sub>6</sub>H<sub>14</sub>)**. These data were collected using Cu K $\alpha$  X-rays over a period of 5h and 12 min (total exposure to Cu K $\alpha$  rays of 41 h and 36 min).

Note: Fractional values for C and H are given in the following formula due to the partial occupancy of the methyl carbon bound to lanthanum that results from the formation of  $\text{La}(\text{SAr}^{i\text{Pr6}})_2$ , **2**, under the conditions of the diffraction experiment.

|                                                |                                                                 |
|------------------------------------------------|-----------------------------------------------------------------|
| Empirical formula                              | $\text{LaS}_2\text{C}_{72.25}\text{H}_{98.75}$                  |
| Formula weight                                 | 1170.29                                                         |
| Temperature/K                                  | 100.00                                                          |
| Crystal system                                 | monoclinic                                                      |
| Space group                                    | C2/c                                                            |
| a/Å                                            | 21.0489(8)                                                      |
| b/Å                                            | 18.3665(6)                                                      |
| c/Å                                            | 36.3898(17)                                                     |
| $\alpha/^\circ$                                | 90                                                              |
| $\beta/^\circ$                                 | 93.102(3)                                                       |
| $\gamma/^\circ$                                | 90                                                              |
| Volume/Å <sup>3</sup>                          | 14047.5(10)                                                     |
| Z                                              | 8                                                               |
| $\rho_{\text{calc}}/\text{g/cm}^3$             | 1.107                                                           |
| $\mu/\text{mm}^{-1}$                           | 5.513                                                           |
| F(000)                                         | 4970.0                                                          |
| Crystal size/mm <sup>3</sup>                   | 0.116 × 0.09 × 0.087                                            |
| Radiation                                      | CuK $\alpha$ ( $\lambda$ = 1.54178)                             |
| 2 $\theta$ range for data collection/ $^\circ$ | 4.864 to 136.486                                                |
| Index ranges                                   | -23 ≤ h ≤ 24, -20 ≤ k ≤ 20, -40 ≤ l ≤ 36                        |
| Reflections collected                          | 56233                                                           |
| Independent reflections                        | 11752 [ $R_{\text{int}}$ = 0.1118, $R_{\text{sigma}}$ = 0.0898] |
| Data/restraints/parameters                     | 11752/481/890                                                   |
| Goodness-of-fit on $F^2$                       | 1.002                                                           |
| Final R indexes [ $ I  \geq 2\sigma(I)$ ]      | $R_1$ = 0.0730, $wR_2$ = 0.1713                                 |
| Final R indexes [all data]                     | $R_1$ = 0.1548, $wR_2$ = 0.2095                                 |
| Largest diff. peak/hole / e Å <sup>-3</sup>    | 0.49/-0.42                                                      |



**X-ray Data Collection, Structure Solution and Refinement for a Second Crystal of  $\text{La}(\text{SAr}^{\text{Pr6}})_2\text{CH}_3 \cdot 0.5(\text{C}_6\text{H}_{14})$ ,  $1 \cdot 0.5(\text{C}_6\text{H}_{14})$  (41 h and 36 min of X-ray Irradiation with Cu K $\alpha$  X-rays).**

Without disturbing the crystal from the prior experiment, data were collected again on this crystal using Cu K $\alpha$  X-rays. As described above, the APEX5<sup>5</sup> program package was used to determine the unit-cell parameters and for data collection (4.5 sec/frame scan time). The raw frame data was processed using SAINT<sup>6</sup> and SADABS<sup>7</sup> to yield the reflection data file. Subsequent calculations were carried out using the SHELXTL<sup>8</sup> program package. The diffraction symmetry was  $2/m$  and the systematic absences were consistent with the monoclinic space groups  $Cc$  and  $C2/c$ . It was later determined that space group  $C2/c$  was correct.

The structure was solved by direct methods and refined on  $F^2$  by full-matrix least-squares techniques. The analytical scattering factors<sup>9</sup> for neutral atoms were used throughout the analysis. Hydrogen atoms were included using a riding model. The occupancies of the La, La1, and C1 atoms were first refined freely until a stable model was obtained and then the occupancies of the La1 and C1 atoms were fixed to the occupancy of the freely refined C1 atom and rounded to the nearest hundredth (0.25). The occupancy of La1A was then fixed to the remaining balance (0.75). Further disorder related to the conversion of **1** to **2** was modeled using the same ratio of occupancies. The disordered half molecule of hexane was excluded from refinement using SQUEEZE.<sup>10</sup> Least-squares analysis yielded  $wR_2 = 0.2095$  and Goof = 1.002 for 890 variables refined against 11752 data (0.79 Å),  $R1 = 0.0730$  for those 5605 data with  $I > 2.0\sigma(I)$ .

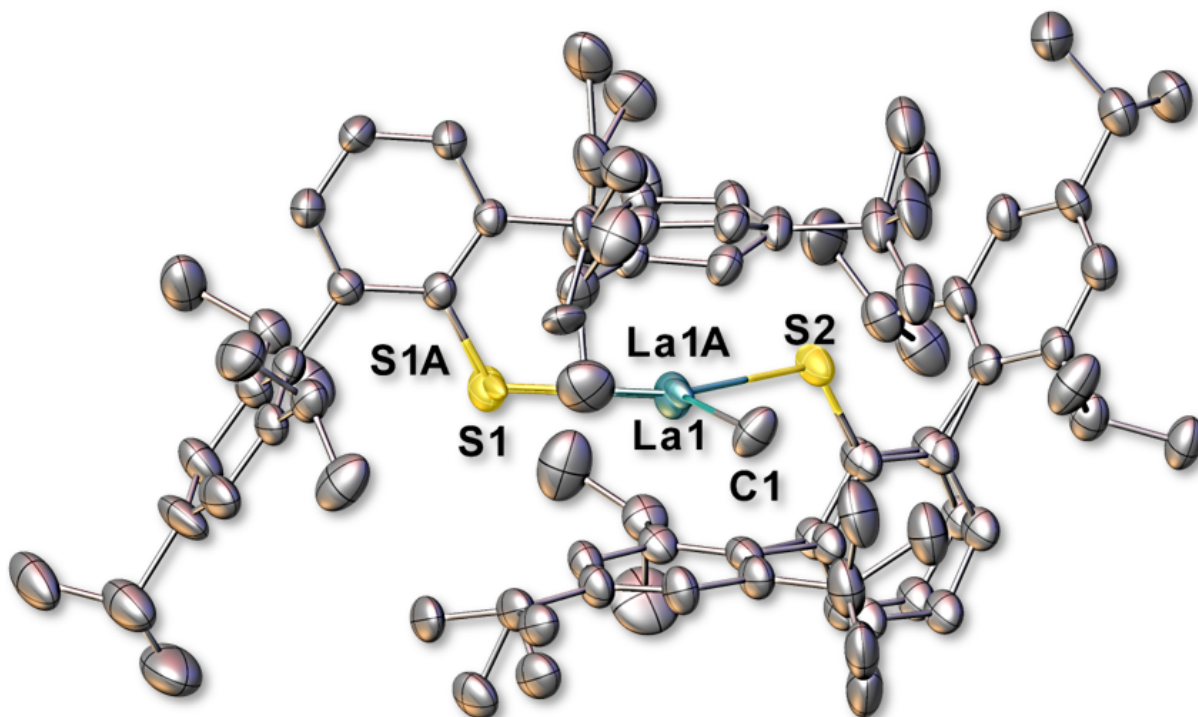

**Figure S13.** The molecular structure of a second crystal of  $\text{La}(\text{SAr}^{i\text{Pr}_6})_2\text{CH}_3$ , **1**, showing the conversion of **1** to **2** after 41 h and 36 min of data collection using Cu  $K\alpha$  X-rays. Thermal ellipsoids are drawn at 20% probability. Hydrogen atoms are not shown. The occupancies of La1, C1, S1, and S2 are 25%, while the occupancies of La1A, S1A, and S2A are 75%. The occupancies of the affected carbons of the disordered flanking ring have been fixed to the same ratio in the model.



## References.

- (1) Pangborn, A. B.; Giardello, M. A.; Grubbs, R. H.; Rosen, R. K.; Timmers, F. J. Safe and Convenient Procedure for Solvent Purification. *Organometallics* **1996**, *15* (5), 1518-1520.
- (2) Gilbert-Bass, K.; Stennett, C. R.; Grotjahn, R.; Ziller, J. W.; Furche, F.; Evans, W. J. Exploring sulfur donor atom coordination chemistry with La(II), Nd(II), and Tm(II) using a terphenylthiolate ligand. *Chem. Commun.* **2024**, *60*, 4601-4604.
- (3) Luevano, M. R.; Stennett, C. R.; Ziller, J. W.; Evans, W. J. Terphenylthiolate-Ligated Lanthanide Terminal Methyl Complexes Form Crystallographically Characterizable Terminal Acyls and Trimethylcyclopropanetriolates from Carbon Monoxide. *J. Am. Chem. Soc.* **2025**, *147* (15), 12386-12391.
- (4) Luevano, M. R.; Stennett, C. R.; Ma, E.; Ziller, J. W.; Furche, F.; Evans, W. J. The Divergent Reduction Chemistry of Ln(II) Bis(terphenylthiolate) Complexes,  $\text{Ln}(\text{SAr}^{i\text{Pr}_6})_2$ , Leads to  $\text{KLn}(\mu\text{-SAr}^{i\text{Pr}_6})_2$ , C–H Bond Activation Products, and Two-Electron Reduction Reactivity. *J. Am. Chem. Soc.* **2025**, *147* (38), 34249-34255.
- (5) APEX5 Version 2023.9-2. Bruker AXS, Inc.; Madison, WI: 2023.
- (6) SAINT Version 8.40b. Bruker AXS, Inc.; Madison, WI: 2013.
- (7) Sheldrick, G. M. SADABS, Version 2016/2. Bruker AXS, Inc.; Madison, WI: 2016.
- (8) Sheldrick, G. M. SHELXTL, Version 2014/7. Bruker AXS Inc.; Madison WI: 2014.
- (9) *International Tables for Crystallography, Vol. C*; Dordrecht: Kluwer Academic Publishers, 1992.
- (10) Spek, A. L. *PLATON SQUEEZE*: a tool for the calculation of the disordered solvent contribution to the calculated structure factors. *Acta Crystallographica Section C* **2015**, *71* (1), 9-18.
